# 1 **Class A GPCRs use the membrane potential to increase their sensitivity** 2 **and selectivity**

3

4

5 Daria N. Shalaeva<sup>1,2</sup>, Dmitry A. Cherepanov<sup>2,4</sup>, Michael Y. Galperin<sup>5</sup>, Gert Vriend<sup>6</sup>  
6 and Armen Y. Mulkidjanian<sup>1,2,3\*</sup>

7

8 <sup>1</sup>School of Physics, Osnabrück University, 49069, Osnabrück, Germany; <sup>2</sup>A.N. Belozersky Institute of  
9 Physico-Chemical Biology and <sup>3</sup>School of Bioengineering and Bioinformatics, Lomonosov Moscow  
10 State University, Moscow 117999, Russia; <sup>4</sup>N.N. Semenov Institute of Chemical Physics, Russian  
11 Academy of Sciences, 119991 Moscow, Russia; <sup>5</sup>National Center for Biotechnology Information,  
12 National Library of Medicine, National Institutes of Health, Bethesda, Maryland 20894, USA; <sup>6</sup>Centre  
13 for Molecular and Biomolecular Informatics, Radboud University Medical Centre, 6525 HP  
14 Nijmegen, The Netherlands

15

16 \*Corresponding author: Armen Y. Mulkidjanian, School of Physics, Osnabrück University, 49069,  
17 Osnabrück, Germany, E-mail: amulkid@uni-osnabrueck.de

18

## 19 **Author E-mails:**

20 Daria N. Shalaeva, dshalaeva@uni-osnabrueck.de

21 Dmitry A. Cherepanov, cherepanov@belozersky.msu.ru

22 Michael Y. Galperin, galperin@nih.gov

23 Gert Vriend, vriendgert@gmail.com

24

## 25 **Abbreviations**

26 cAMP, 3'-5'-cyclic adenosine monophosphate; GPCR, G-protein coupled receptor, MR, microbial  
27 rhodopsin, RMSD, root-mean-square deviation; TM, transmembrane, NR - Na-translocating microbial  
28 rhodopsin, ChR2 - channelrhodopsin 2.

29

30 **Abstract**

31 The human genome contains about 700 genes of G protein-coupled receptors (GPCRs) of  
32 class A; these seven-helical membrane proteins are the targets of almost half of all known  
33 drugs. In the middle of the helix bundle, crystal structures revealed a highly conserved  
34 sodium-binding site, which is connected with the extracellular side by a water-filled tunnel.  
35 Sodium ions are observed in GPCRs crystallized in their inactive conformations, but not in  
36 GPCRs that were trapped in agonist-bound active conformations. The escape route of the  
37 sodium ion upon the inactive-to-active transition and its very direction, either into the  
38 cytoplasm or back outside the cell, hitherto remained obscure. We modeled sodium-binding  
39 GPCRs as electrogenic carriers of sodium ions. In this model the sodium gradient over the  
40 cell membrane would increase the sensitivity of GPCRs if their activation is  
41 thermodynamically coupled to the translocation of the sodium ion into the cytoplasm, while  
42 decreasing it if the sodium ion retreats into the extracellular space upon receptor activation.  
43 The model quantitatively describes the available data on both activation and suppression of  
44 distinct GPCRs by membrane voltage. The model also predicts selective amplification of the  
45 signal from (endogenous) agonists if only they, but not their (partial) analogs, could induce  
46 sodium translocation. Comparative structure and sequence analyses of sodium-binding  
47 GPCRs indicate a key role for the conserved leucine residue in the second transmembrane  
48 helix (Leu2.46) in coupling sodium translocation to receptor activation. Hence, class A  
49 GPCRs appear to utilize the energy of the transmembrane sodium potential to increase their  
50 sensitivity and selectivity.

51 .

52

## 53 Introduction

54 G-protein coupled receptors (GPCRs) are integral membrane proteins that consist of seven  
55 transmembrane (TM) helices surrounding a relatively polar core [1-4] (Fig. 1A-C). In most  
56 GPCRs, binding of the endogenous ligand (agonist) by the "inactive" form of protein causes a  
57 conformational change of the helical bundle (Fig. 1). The activated GPCR interacts with a G  
58 protein, which then triggers the intracellular signaling cascade. GPCRs are divided into  
59 several classes: rhodopsin-like receptors (class A), secretin receptors (class B), glutamate  
60 receptors (class C), fungal mating pheromone receptors (class D), cAMP receptors (class E),  
61 and frizzled receptors (class F). Sequence and structure comparisons of GPCRs support the  
62 notion that most, if not all, of them have a common evolutionary origin [5-7].

63 GPCRs are widespread among eukaryotes and are intensively studied for their ability to  
64 regulate various cellular processes. Different classes of GPCRs are unevenly represented in  
65 sequenced genomes from various eukaryotic lineages. In humans, class A GPCRs are the  
66 largest protein family with about 700 genes, whereas all other classes of GPCRs together  
67 have only about 150 representatives [6]. Human GPCRs serve as targets for about half of all  
68 known drugs [1].

69 The recent avalanche of high-resolution X-ray structures of GPCRs in ligand-free, agonist-  
70 bound, and antagonist-bound forms revealed many important features of their functioning [4,  
71 8-16]. The major feature is that activation of GPCRs is associated with a large displacement  
72 of the cytoplasmic half of helix 6. A conserved Trp residue in the middle of this helix  
73 (Trp6.48 according to the Ballesteros–Weinstein numeration for class A GPCRs as modified  
74 by Isberg et al. [17, 18], used hereafter) serves as the pivot of this motion, see Fig. 1C and [2,  
75 9, 19-25]. Another feature uncovered by these structures was the presence of Na<sup>+</sup> ions in the  
76 vicinity of the ligand-binding sites in several class A GPCRs [12, 15, 16, 26-28]. The Na<sup>+</sup>  
77 binding site is connected to the extracellular side through a clearly visible tunnel, but  
78 separated from the cytoplasmic side by a cluster of hydrophobic residues (Fig. 1A, B and [25,  
79 26]). Analysis of the crystal structures of GPCRs in the active state (bound with agonists)  
80 shows that the Na<sup>+</sup>-binding pocket collapses from ~200 to 70 Å<sup>3</sup> due to the movements of  
81 TM helices upon activation [26]. There is no space for the Na<sup>+</sup> ion in the active state,  
82 suggesting that it leaves the receptor upon activation [12].

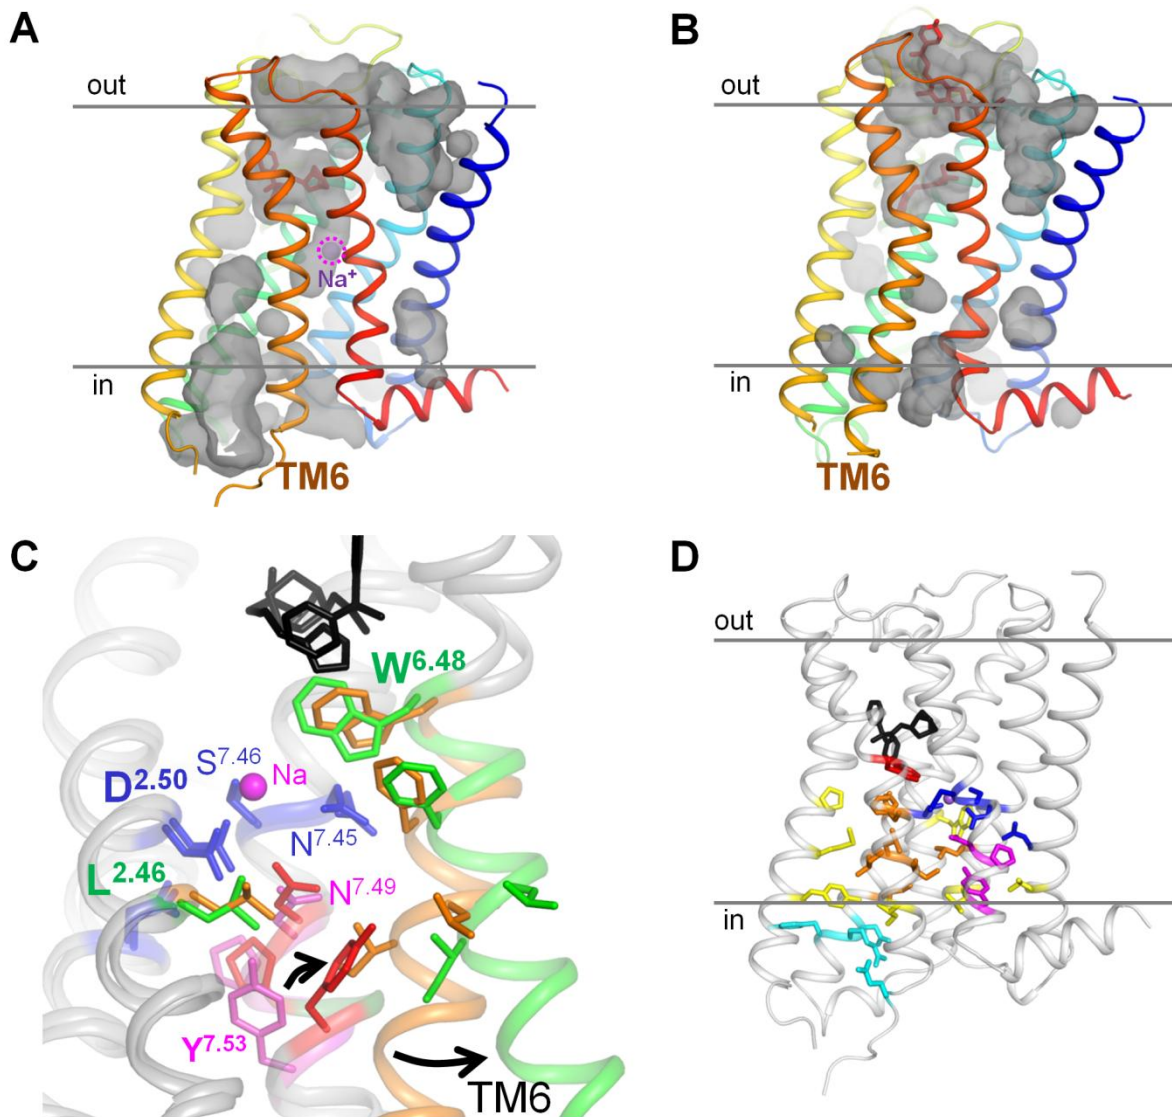

83  
84

85 **Fig. 1. Active and inactive conformations of GPCRs.** **A, B,** conformations of the muscarinic  
86 acetylcholine receptor M<sub>2</sub> in the inactive state (A, PDB 3UON [14]) and active state (B, PDB  
87 4MQT [13]) with cavities shown; the lines indicate the boundaries of the membrane hydrophobic  
88 layer as taken from OPM database [29], “out” indicates the extracellular side, “in” indicates the  
89 cytoplasmic side. **C.** Superposition of the structures of M<sub>2</sub> receptor in the inactive state ( the first layer  
90 of hydrophobic residues around the Na<sup>+</sup>-binding site colored ochre and residues of the NPxxY motif  
91 colored magenta) and in the active state ( the first layer of hydrophobic residues around the Na<sup>+</sup>-  
92 binding site colored green and residues of the NPxxY motif colored red). The protein is shown as a  
93 gray cartoon, the agonist LY2119620 and antagonist 3-quinuclidinyl-benzilate are in black, Na<sup>+</sup>-  
94 coordinating residues are colored dark blue. **D,** Overall location of the conserved motifs and  
95 hydrophobic residue clusters in GPCRs, shown on the structure of M<sub>2</sub> receptor in the inactive state  
96 (PDB 3UON). The Trp6.48 residue is colored red, the second layer of hydrophobic residues is colored  
97 yellow, the residues of the DRY motif and the ionic lock are in light blue. Otherwise the color code as  
98 on panel C.

99 The Na<sup>+</sup> binding residues are highly conserved among class A GPCRs [26, 28], indicating  
100 that the Na<sup>+</sup> ion must be functionally important. Indeed, replacement of the key Na<sup>+</sup>-binding  
101 Asp2.50 residue in helix 2 (see Fig. 1) facilitates binding of agonists by increasing the  
102 association constants by 2-3 orders of magnitude in many, albeit not all, cases [26, 28, 30-  
103 32]. In many cases, Na<sup>+</sup> depletion increased the basal activity of the respective receptor in the  
104 absence of an agonist, suggesting that the Na<sup>+</sup> ion stabilizes the inactive state of the receptor  
105 [26, 30, 32, 33]. This interpretation is consistent with the structural data that show that the  
106 Na<sup>+</sup> ion is not observed in GPCRs in an active conformation [13, 26, 28, 34, 35].

107 Several years ago, Katritch and colleagues made a seminal suggestion that the Na<sup>+</sup> ion does  
108 not return into the extracellular medium but instead gets released into the cytoplasm upon  
109 GPCR activation [26]. The suggested mechanism, however, would require a transient  
110 opening of a conduit for the Na<sup>+</sup> ion. Although the available structures of activated, Na<sup>+</sup>-  
111 lacking GPCRs [13, 34, 35] show no such a conduit, several computer simulations indicated a  
112 possibility of a transient water-filled channel connecting the Na<sup>+</sup>-binding site with the  
113 cytoplasm [24, 36, 37]. The proposed ability for the Na<sup>+</sup> ion to traverse the GPCR molecule  
114 is also supported by the structural similarity between GPCRs and Na<sup>+</sup>-translocating bacterial  
115 rhodopsins (Fig. S1), which suggests their common origin [7] and a common ability to  
116 translocate the Na<sup>+</sup> ion.

117 Since the cytoplasm is negatively charged relatively to the extracellular medium, transfer of  
118 the Na<sup>+</sup> cation into the cell could give an energy boost for the GPCR activation [26].  
119 Depolarization of the membrane would thus prevent the GPCR activation. This kind of  
120 behavior has been, indeed, observed with many GPCRs. Still, some GPCRs, by contrast,  
121 were activated by depolarization, whereas some others were insensitive to it; see [38, 39] for  
122 reviews. Hence, the relation between the transmembrane gradient of sodium ions and GPCR  
123 activation deserves further clarification.

124 Unfortunately, the anticipated translocation of only one Na<sup>+</sup> ion per activation event  
125 translates into a very weak electric current, which hampers the experimental tracking of this  
126 process. In the absence of direct experimental data on the Na<sup>+</sup> ion translocation, we have  
127 addressed it through modeling and comparative structural analyses.

128 Building on their similarity with Na<sup>+</sup>-translocating microbial rhodopsins, we modeled class A  
129 GPCRs as facultative sodium carriers. The model implies that the bound Na<sup>+</sup> ion, upon  
130 activation, can either slip in into the cytoplasm via a transiently opened passage (the carrier-

131 on mode) or return to the extracellular side (the carrier-off mode). Just by varying the  
132 dissociation constants for the agonist and the sodium ion, our model quantitatively describes  
133 the available data on both activation and suppression of GPCRs by membrane voltage. In  
134 addition, by combining evolutionary analyses with structural comparisons of GPCRs, we  
135 have identified the strictly conserved leucine residue in the second transmembrane helix  
136 (Leu2.46 in class A GPCRs) as the key player in coupling sodium translocation to receptor  
137 activation.

138 In summary, this study proposes a mechanism that links GPCR activation, via  $\text{Na}^+$   
139 translocation, with the energy of membrane potential thereby offering an explanation for the  
140 high sensitivity and selectivity of class A GPCRs.

141

## 142 **Results**

### 143 **1. Modeling $\text{Na}^+$ translocation in GPCRs**

144 We developed a model of GPCR activation that is analogous to earlier approaches to  
145 modeling energy-converting enzymes [40] and GPCRs [41-44] but takes into account the  
146 possibility of electrogenic translocation of a single  $\text{Na}^+$  ion by a GPCR concomitantly with its  
147 activation.

148 The model considers a GPCR ensemble large enough for thermodynamic modeling. Each  
149 receptor exists in a steady state balance between its active and inactive states; agonists shift  
150 the distribution towards the active state, whereas  $\text{Na}^+$  binding stabilizes the inactive state  
151 (Fig. 2A). Both the inactive and active states were shown to exist as series of fast exchanging  
152 conformation sub-states [2, 45-47]; for simplicity, we do not consider these sub-states in the  
153 model. Also for simplicity it is just assumed that an activated GPCR triggers the signaling  
154 cascade; the interaction of the active state with any other component (G-protein or arrestin) is  
155 not modeled. The model includes three binary transitions: (i) activation of the receptor, (ii)  
156 binding of the  $\text{Na}^+$  ion, and (iii) binding of a signaling molecule (e.g. an agonist). These three  
157 transitions can be presented as a cubic graph with 8 separate states (Fig. 2B). Each of the  
158 transitions is determined by its equilibrium constant: the receptor activation constant L, the  
159  $\text{Na}^+$  association constant M, and the agonist association constant N (Table 1).

160 As shown in Fig. 2A, a GPCR has two operation modes: in the carrier-on mode (mode 1), the  
161  $\text{Na}^+$ -binding site can communicate with the cytoplasm, whereas in the carrier-off mode

162 (mode 2), the Na<sup>+</sup>-binding site communicates only with the extracellular side. If the receptor  
163 operates in the carrier-off mode, all its eight states are in a thermodynamic equilibrium, and  
164 we can apply to them the principle of detailed balance (the forward and backward rates of  
165 transitions match each other). If the GPCR can translocate a Na<sup>+</sup> ion across the membrane  
166 (carrier-on mode), then, under conditions of a nonzero transmembrane electrochemical  
167 sodium potential difference (sodium gradient), the slowest transitions in Fig. 2B are not in  
168 equilibrium (the forward and backward rates of these transitions do not match each other).

169 Our model assumes that the rate-limiting step is the slow "activating" conformational  
170 transition from the R state to the final R\* state [44]. The ligand binding to the initial  
171 encounter state R, binding/release of the Na<sup>+</sup> ion, and conformational transitions within  
172 inactive and active states are considered rapid as compared to the R to R\* transition, which  
173 appears to be coupled with the pivotal movement of helix 6 in most class A GPCRs [2, 9, 19-  
174 25]. In the case of opsin, the pivotal movement occurred slower than at 10<sup>-4</sup> s with the  
175 activation energy as high as 60 kJ/mol [20, 48]. The slowness of the transition was also  
176 confirmed by NMR data [22, 46]. The assumption of the slow activating transition is in  
177 agreement with both the induced-fit model [43, 44, 47] and the conformational selection  
178 model [46]; these two models appear to describe the operation of most GPCRs. Then, at  
179 equilibrium, receptor activation is determined by the changes in the free energy of particular  
180 states and can be described using the principle of detailed balance, according to which each  
181 elementary process should be equilibrated by its reverse process at equilibrium. Since  
182 activation of the receptor is much slower than any other transitions in the model, the detailed  
183 balance principle can be applied separately to all inactive and all active receptor states (the  
184 left-hand and right-hand sides of the cubic diagram in Fig. 2B, respectively).

185

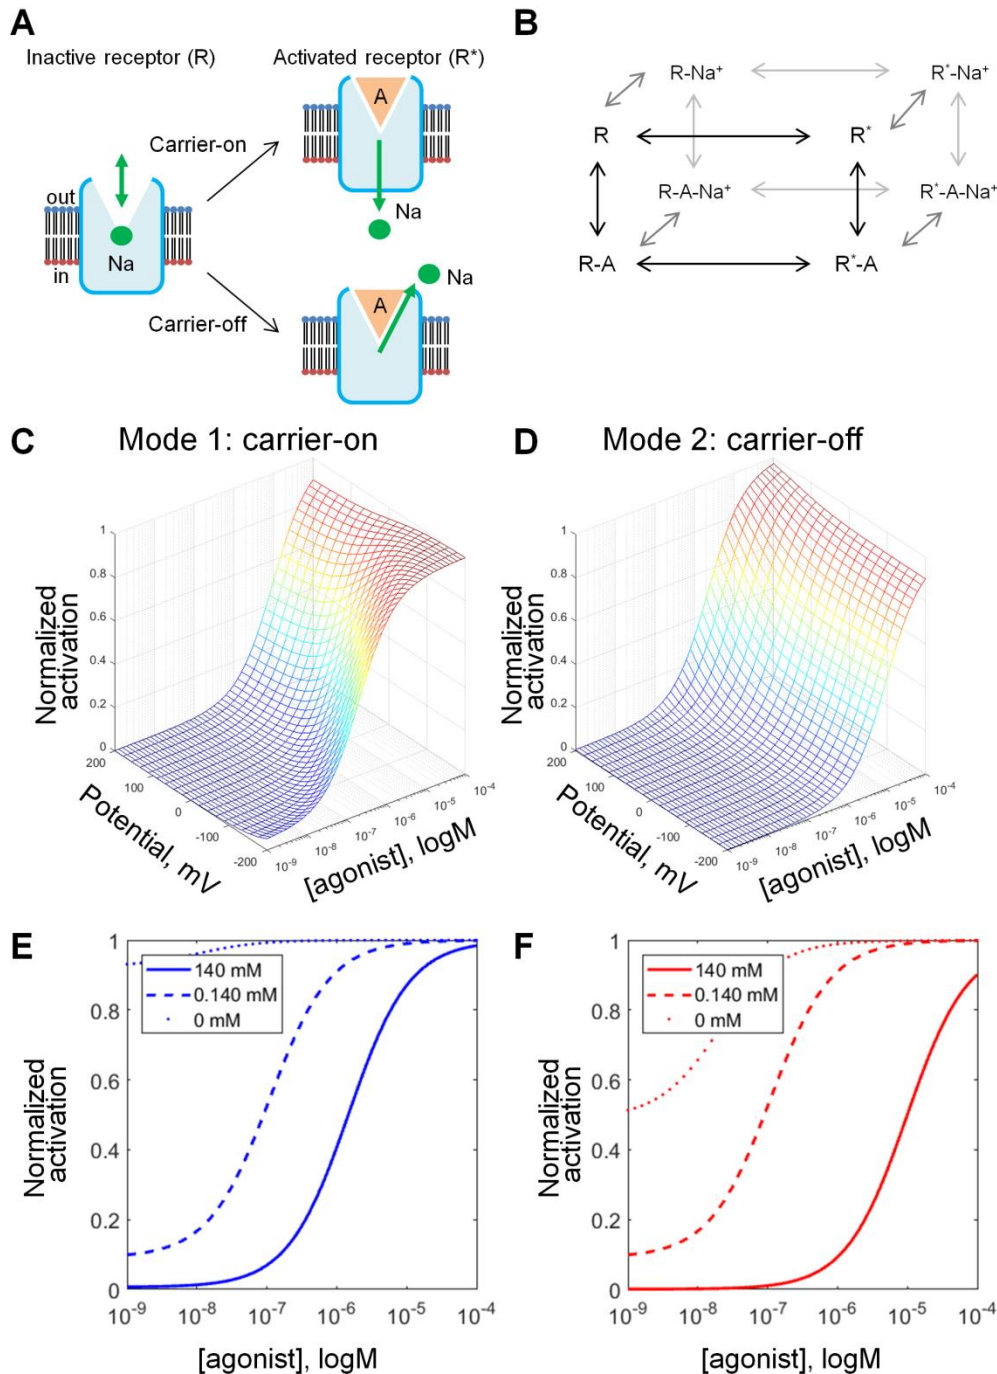

186

187 **Figure 2. Kinetic models describing the behavior of the Na<sup>+</sup> ion upon GPCR activation.**

188 **A.** Schematic representation of GPCR activation in carrier-on and carrier-off modes. In both modes,  
189 the binding of a Na<sup>+</sup> ion by a GPCR is much more likely in the inactive state than in the active state.  
190 When activation of the receptor is triggered by the agonist binding, Na<sup>+</sup> leaves its binding site. In  
191 mode 1 (carrier-on), Na<sup>+</sup> escapes to the cytoplasm, thus penetrating the membrane. In mode 2 (carrier-  
192 off), Na<sup>+</sup> escapes back into the extracellular space. **B.** General scheme of the model that describes the  
193 effect of the agonist and Na<sup>+</sup> as allosteric modulators on the distribution of the receptor between the  
194 active (R\*) and inactive (R) states. **C, D.** Effect of the membrane potential on the concentration-  
195 response curves of GPCR activation as calculated for the mode 1 (carrier-on) (C) and mode 2 (carrier-  
196 off) (D). The curves were plotted with constant allosteric coefficients ( $\alpha, \beta, \gamma, \delta$ ) from Table 1,  $M=10^5$ ,  
197  $N=10^5$ , and  $\theta=0.65$ ; **E, F,** Effect of  $[Na^+]_{out}$  on the concentration-response curves of GPCR activation,  
198 membrane voltage was set to -90 mV, other parameters as in Table 1.



199 In the absence of a ligand, the fraction of receptors in the  $R^*$  state is determined by the  
200 equilibrium constant  $L$ . Generally,  $L$  should be about 1, otherwise the receptor will be  
201 blocked in one of the two states. The exact value of  $L$ , however, is unknown; its  
202 determination requires experimental data on the distribution of active and inactive states in  
203 the absence of both  $\text{Na}^+$  ions and ligands, which are difficult to obtain. In this study, we set  
204 the value  $L=1$ . This value was chosen to produce very little activity at low concentrations of  
205 the agonist in the presence of  $\text{Na}^+$  ions, but also to exhibit some activity in their absence,  
206 since this would most closely mimic the behavior of experimental systems [26, 27, 30, 32,  
207 33]. Specifically,  $\beta_2$ -adrenergic receptors were biased towards inactive conformation both  
208 when studied by  $^{19}\text{F}$ -NMR and double electron-electron resonance spectroscopy (detergent-  
209 stabilized samples, 100 mM NaCl) [2] and by single-molecule monitoring of fluorescent  
210 probes (nanodisc-embedded receptors, 150 mM NaCl) [45].

211 The initial values of the agonist and sodium association constants were set to  $N=10^7 \text{ M}^{-1}$  and  
212  $M=10^3 \text{ M}^{-1}$ , respectively, in accordance with the physiologically relevant agonist and sodium  
213 concentrations, see [27, 49, 50].

214 The allosteric coefficients  $\alpha$ ,  $\beta$ ,  $\gamma$ , and  $\delta$  describe the extent of coupling between the  
215 transitions, i.e. their interdependence, see Table 1. The coefficient  $\alpha$  reflects the effect of  $\text{Na}^+$   
216 ion binding on the receptor activation. Based on experimental evidence,  $\text{Na}^+$  ions inhibit  
217 receptor activation [26, 28, 30-32], thus this coefficient should be  $\ll 1$ . The coefficient  $\beta$   
218 reflects the effect of agonist binding on the activation of the receptor. As agonist binding  
219 stimulates receptor activation, this value was expected to be  $\gg 1$ . The coefficient  $\gamma$  reflects  
220 the effect of agonist binding on the  $\text{Na}^+$  ion binding. Available crystal structures of GPCR  
221 with  $\text{Na}^+$  ion bound usually do not contain an agonist molecule, whereas the structures of the  
222 same proteins with agonist bound have no space for a  $\text{Na}^+$  ion [26]; therefore, the value of  $\gamma$   
223 was expected to be  $\ll 1$ . The triple allosteric interaction coefficient  $\delta$  reflects the coupling  
224 between all three processes. Probabilities of individual states are also affected by  $\text{Na}^+$   
225 concentrations, which were set at physiological values of  $[\text{Na}]_{\text{out}}= 140 \text{ mM}$  and  $[\text{Na}]_{\text{in}}=10$   
226 mM (Table 1). Further details of the model and its solution are described in **Methods**.

227

228 **Table 1. Initial parameters of the model**

| Parameter                  | Value                 | Description <sup>a</sup>                                                                                                              |
|----------------------------|-----------------------|---------------------------------------------------------------------------------------------------------------------------------------|
| M                          | $10^3 \text{ M}^{-1}$ | Association constant of the sodium ion (initial value)                                                                                |
| N                          | $10^7 \text{ M}^{-1}$ | Association constant of the agonist (initial value)                                                                                   |
| L                          | 1                     | Receptor activation constant                                                                                                          |
| $\alpha$                   | $10^{-3}$             | Intrinsic efficacy of sodium: ratio of affinity of sodium for R* and R                                                                |
| $\beta$                    | $10^3$                | Intrinsic efficacy of the agonist: ratio of affinity of the agonist for R* and R                                                      |
| $\gamma$                   | $10^{-2}$             | Binding cooperativity between the sodium ion and the agonist: ratio of affinity of A for R-Na and R, or of Na for R-A and R           |
| $\delta$                   | $10^2$                | Activation cooperativity between the sodium ion and the agonist: ratio of affinity of A for R*-Na and R-Na, or of Na for R*-A and R-A |
| $\text{Na}^+_{\text{out}}$ | 140 mM                | $[\text{Na}^+]$ in the extracellular medium                                                                                           |
| $\text{Na}^+_{\text{in}}$  | 10 mM                 | $[\text{Na}^+]$ in the cell cytoplasm                                                                                                 |

229

230 <sup>a</sup> The names of parameters are taken from ref. [42].

231

232 Fig. S2 shows how the shape of activation curves varies with variation of parameters  $\alpha$ ,  $\beta$ ,  $\gamma$ ,  
 233 and  $\delta$  in the carrier-on mode. These concentration - response curves report the sensitivity of  
 234 the receptor: they show how much agonist is needed to activate the receptor. Fig. S2 shows  
 235 that increasing the value of  $\delta$ , which characterizes the coupling between the (i) binding of  
 236 agonist, (ii) release of the  $\text{Na}^+$  ion into the cytoplasm and (iii) activation of the receptor,  
 237 increases the sensitivity of the receptor (less agonist is needed for activation, see Fig. S2D).

238 Based on comparison of the fit curves (Fig. S2) with experimentally measured typical  
 239 activation curves for several GPCRs, we set the initial values of  $\alpha$ ,  $\beta$ , and  $\gamma$  to 1000, 0.001,  
 240 and 0.01, respectively (Table 1). Then the product  $\alpha\beta\gamma$  equals 0.01, which means that the  
 241 concurrent binding of the  $\text{Na}^+$  ion and agonist shifts the receptor into the inactive state. Such  
 242 an inactivation could be avoided by setting  $\delta$ , the triple allosteric interaction coefficient that  
 243 reflects the coupling between all three processes, at  $\gg 1$ . The value of  $\delta$  was initially set to  
 244 100, so that the product of multiplication of all coefficients was 1, see Methods for details.

245 Because of the charge of the  $\text{Na}^+$  ion, the probabilities of states in Fig. 2B would also be  
 246 affected by membrane voltage. Since cell cytoplasm is charged negatively relative to the  
 247 extracellular medium, membrane voltage pushes the  $\text{Na}^+$  ion from the extracellular side to the  
 248 cytoplasmic side of the membrane. Hence, membrane voltage favors the translocation of the  
 249  $\text{Na}^+$  ion (i) from the outside into the  $\text{Na}^+$ -binding site and (ii) from the  $\text{Na}^+$ -binding site into  
 250 the cytoplasm. In contrast, the retreat of the  $\text{Na}^+$  ion to the extracellular site would be

251 hampered by membrane voltage. The energy gap imposed by membrane voltage can be then  
252 defined as:

$$253 \quad F_1 = e^{\theta \cdot e \cdot \Delta\psi / k_B T} \quad (1).$$

254 where  $\Delta\psi$  is the membrane voltage,  $e$  is the cation charge, and the coefficient  $\theta$  reflects the  
255 depth of the  $\text{Na}^+$ -binding site in the membrane, with  $\theta = 0$  corresponding to the  $\text{Na}^+$  ion on  
256 the extracellular side of the membrane and  $\theta = 1$  corresponding to the  $\text{Na}^+$  ion on the  
257 cytoplasmic side of the membrane.

258 Based on the actual position of the  $\text{Na}^+$  ion in available crystal structures (Fig. 1) and  
259 assuming a symmetrical distribution of dielectric permittivity value along the transmembrane  
260 axis, we have set  $\theta=0.65$  for the  $\text{Na}^+$ -binding site in class A GPCRs.

261 Hence, in the inactive conformation, the membrane voltage promotes  $\text{Na}^+$  binding from the  
262 extracellular medium by pushing the cation inside the membrane with the force  $F_1$  (see Eq.  
263 1). In the carrier-on mode, membrane voltage could push the  $\text{Na}^+$  ion from its binding site in  
264 the middle of the membrane into the cytoplasm with the force of

$$265 \quad F_2 = e^{(\theta-1) \cdot e \cdot \Delta\psi / k_B T} \quad (2).$$

266 As shown in Fig. 2C and 2B, the same initial parameters from Table 1 yield different  
267 activation curves and different dependence on the membrane voltage depending on the  
268 operation mode. In the carrier-on mode, the receptor displays the highest sensitivity at the  
269 membrane voltage of -200 mV, while neutral and positive voltage values lead to weaker  
270 activation, with more agonist required to reach the same activation level. In the carrier-off  
271 mode, the dependence of activation on the membrane voltage is opposite: the receptor is  
272 more efficient at positive voltage values; here the difference in activation curves at different  
273 voltage values is much less pronounced than in the carrier-on mode.

274 The curves in Fig. 2C, D and Fig. S2 were calculated at fixed physiological concentrations of  
275  $\text{Na}^+$  ions in the external medium and in the cytoplasm (Table 1). In Fig. 2, panels E and F  
276 show the activation curves as a function of external  $\text{Na}^+$  concentration. Decreasing the  $\text{Na}^+$   
277 levels increases both the sensitivity of the receptor and the probability of receptor activation  
278 in the absence of agonists, in agreement with experimental observations [26, 28, 30-32].

279

280

## 281 **Comparison with experimental data**

282 Several studies have reported voltage-dependent signaling in different GPCRs, see Table S1  
283 and [38, 39] for reviews. The membrane voltage of physiological sidedness (with cytoplasmic  
284 side negatively charged) usually activated GPCRs, although in some cases, e.g. in the  
285 muscarinic acetylcholine receptor  $M_1$ , membrane voltage decreased the activity of the  
286 receptor [49, 51, 52]. In early studies of voltage-dependent behavior of GPCRs, their  
287 activation was followed via downstream reactions, e.g. by measuring the conductance of the  
288 GPCR-regulated ion channels [38, 39]. However, the potential voltage-dependence of the  
289 channels themselves could make the data interpretation ambiguous. Therefore we limited our  
290 scope to the data on voltage dependence of GPCR activation as obtained by using FRET-  
291 based biosensors that responded to the outward movement of the transmembrane helix 6  
292 which is directly linked to receptor activation [34, 49, 50]. Using this technique, Rinne and  
293 colleagues showed that membrane voltage increased the sensitivity of the  $\alpha_{2A}$  adrenoreceptor  
294 to norepinephrine [50]. In addition, membrane voltage increased the sensitivity of muscarinic  
295 acetylcholine receptors  $M_3$  and  $M_5$  to their full agonists acetylcholine and carbachol, but  
296 decreased the sensitivity to the same full agonists in the case of the muscarinic acetylcholine  
297 receptor  $M_1$  [49].

298 We tested whether our model could describe the data of Rinne and colleagues [49, 50]. To  
299 perform the fitting, experimental data points were extracted from respective publications. In  
300 each case, fits were separately performed for the carrier-on and carrier-off modes,  
301 respectively (Fig. 2). For each mode, two sets of data points (as measured at two voltage  
302 values, e.g. -90 and +60 mV) were fitted. The two fit curves were calculated with the same  
303 parameter sets (see Table 1), with the only difference being the voltage values that were taken  
304 from respective experimental data. Both curves were fitted simultaneously by varying only  
305 two parameters, namely the  $\text{Na}^+$  binding constant  $M$  and agonist binding constant  $N$ , which  
306 were kept the same for both voltage values in each case. All other parameters were as in  
307 Table 1. In addition, we performed separate fits with  $\beta=100$ , see Table 2.

308 The fit curves are shown in Fig. 3 and the fit parameters are listed in Table 2. In each case,  
309 one of the two tested modes provided a good fit. In cases when the membrane voltage  
310 increased the sensitivity of the receptor, the experimental data could be fit by the model in  
311 carrier-on mode. For the data in Fig. 3C, where the sensitivity was decreased by membrane  
312 voltage, the carrier-off mode provided a good fit. Varying the  $\theta$  value, which was initially  
313 determined from structure analysis, did not lead to notable fit improvements (data not

314 shown). It is noteworthy that the agonist association constants in Table 2 correspond to the  
315 so-called intrinsic association constants ( $K_a$ ), which could be much smaller than the  
316 observable association constants ( $K_{obs}$ ), see [44, 53].

### A. $\alpha_{2A}$ AR with norepinephrine

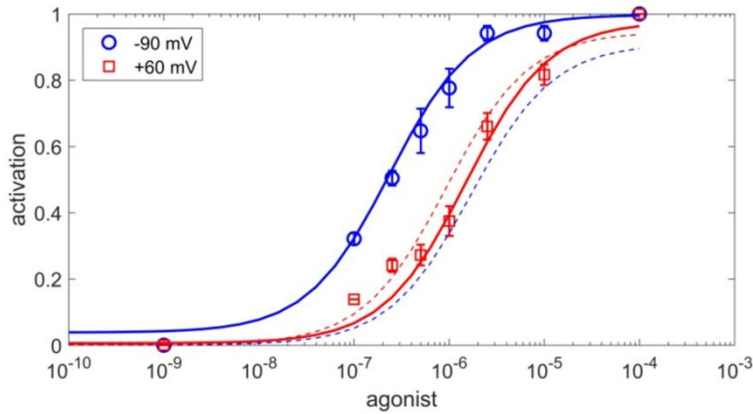

### B. $M_3$ R with carbachol

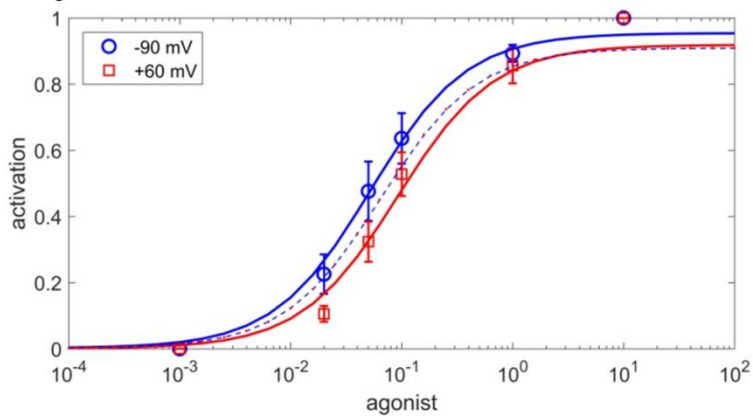

### C. $M_1$ R with carbachol

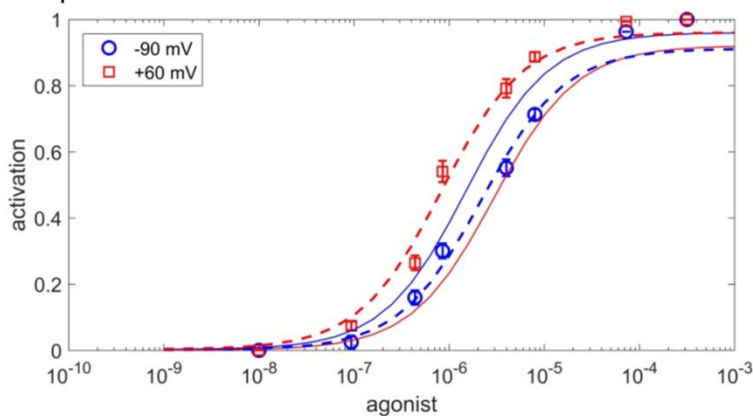

317  
318 **Figure 3. Fitting experimental data of voltage-sensitive GPCR activation.**  
319 The fits for the carrier-on mode 1 are shown by solid lines, the fits for the carrier-off mode 2 are  
320 shown by dashed lines. **A.**  $\alpha_{2A}$  adrenoceptor activation by full endogenous agonist norepinephrine,  
321 experimental data from [50]. **B.** Muscarinic  $M_3$  receptor activation by full agonist carbachol  
322 experimental data from [49]. **C.** Muscarinic  $M_1$  receptor activation by full agonist carbachol,  
323 experimental data from [49].

324 **Table 2. Sodium ion and agonist binding constants as obtained from fitting experimental data**

| Receptor – agonist pairing                        | Mode           | $\beta=1000$                                          |                                               | $\beta=100$                                           |                                               |
|---------------------------------------------------|----------------|-------------------------------------------------------|-----------------------------------------------|-------------------------------------------------------|-----------------------------------------------|
|                                                   |                | Na <sup>+</sup> association constant, M <sup>-1</sup> | Agonist association constant, M <sup>-1</sup> | Na <sup>+</sup> association constant, M <sup>-1</sup> | Agonist association constant, M <sup>-1</sup> |
| $\alpha_{2A}$ -AR with norepinephrine             | 1, carrier-on  | $2.4 \cdot 10^4$                                      | $2.6 \cdot 10^5$                              | $8.7 \cdot 10^3$                                      | $1.1 \cdot 10^6$                              |
| M <sub>3</sub> muscarinic receptor with carbachol | 1, carrier-on  | $3.5 \cdot 10^5$                                      | 8.4                                           | $3.1 \cdot 10^5$                                      | 87.9                                          |
| M <sub>1</sub> muscarinic receptor with carbachol | 2, carrier-off | $2.1 \cdot 10^7$                                      | $6.4 \cdot 10^5$                              | $2.2 \cdot 10^5$                                      | $2.6 \cdot 10^6$                              |

325

326 By using essentially the same set of parameters from Table 1 and varying only the values M  
 327 and N, it was possible to quantitatively fit also the previously obtained experimental data on  
 328 the influence of membrane voltage on the activation of GPCRs as traced via downstream  
 329 reactions (Table S1). An example of such a fit is presented in Fig. S3.

330 Our modeling of experimental data speaks against the obligatory coupling between the  
 331 activation of a GPCR and transmembrane translocation of a Na<sup>+</sup> ion into the cytoplasm. It  
 332 appears that in some GPCRs, the Na<sup>+</sup> ion can retract, upon activation, into the extracellular  
 333 medium. In most studied cases, however, the experimental data are better described by the  
 334 carrier-on operation mode where binding of an agonist is mechanistically coupled to the  
 335 voltage-driven translocation of the Na<sup>+</sup> ion into the cytoplasm.

## 336 **Discussion**

### 337 **1. Modeling the behavior of GPCRs**

338 Here, staying in the traditional bioenergetics framework, we considered Na<sup>+</sup>-dependent  
 339 GPCRs as potential electrogenic Na<sup>+</sup> carriers. The ability of GPCRs to provide a passage for  
 340 a Na<sup>+</sup> ion follows from (i) the results of molecular dynamics simulations [24, 36, 37], (i) the  
 341 evolutionary relatedness of GPCRs to, and structural similarity with, such dedicated  
 342 transporters as Na<sup>+</sup>-dependent bacterial rhodopsin (NR) and channelrhodopsin [7], see the  
 343 discussion below and Fig. S1, S5; and (iii) the data on voltage-driven charge displacements  
 344 within GPCRs [52, 54]. Vichery and colleagues argued that the so-called "gating currents" or  
 345 "sensory currents", measured in response to imposed membrane voltage with some GPCRs  
 346 [52, 54], may reflect the movement of a Na<sup>+</sup> ion from its binding site into the cytoplasm [39].

347 To clarify the benefits from Na<sup>+</sup> translocation, let us consider the thermodynamics of a  
 348 membrane receptor. An "ultimately sensitive" receptor should stay inactive in the absence of

349 agonists and get activated (e.g. by changing its conformation from R to R\*) in response to the  
350 very first arriving molecule(s) of agonist. In such a system, the free energy needed to drive  
351 the conformational change is provided by the binding of agonist; the amount of this free  
352 energy is, however, small when the concentration of agonist is comparable with its  
353 dissociation constant. Indeed, the free energy of binding can be determined as

$$\Delta G = RT \ln \frac{Kd}{[L]}$$

354 where  $Kd$  is the dissociation constant of the ligand (e.g. agonist) and  $[L]$  is the concentration  
355 of the ligand. Then, if the dissociation constant of an agonist is  $10^{-7}$  M, the free energy of its  
356 binding will be zero at  $10^{-7}$  M of agonist and only  $-6$  kJ/mol at  $10^{-6}$  M of agonist. With such a  
357 small energy input, the activation would be possible only if the equilibrium constant between  
358 R and R\* is small (i.e. close to unity, as in our modeling). Then, however, because the energy  
359 of thermal fluctuations is 2.5 kJ/mol (one  $kT$ ) at room temperature, 10% of receptors would  
360 stay constantly activated even in the absence of agonist and produce spurious noisy signal.

361 Selective stabilization of receptors in their inactive state by  $\text{Na}^+$  ions, which are abundant  
362 outside the cell, would help to silence the intrinsically noisy GPCRs in the absence of agonist  
363 molecules. However, such a noise reduction, at the same time, would decrease the sensitivity  
364 of GPCRs. To activate a  $\text{Na}^+$ -blocked receptor, proportionally higher levels of agonists would  
365 be needed. This conundrum can be solved only by invoking an external source of free energy  
366 and coupling it to the receptor activation. The data on voltage dependence of some GPCRs in  
367 Fig. 3A,B and S3 indicate that these GPCRs use the energy of transmembrane electric field to  
368 increase their sensitivity. At physiological membrane voltage of about  $-100$  mV, the strength  
369 of the electric field that pushes the  $\text{Na}^+$  ion across the membrane is approx.  $10^7$  V/m. The  
370 energy of this field could be, however, used only if the receptor activation is mechanistically  
371 coupled to the displacement of the ion.

372 How much free energy could be gained this way *in vivo*? In experiments where the voltage  
373 was varied by 150 mV (between  $-90$  mV and  $60$  mV, see Fig. 3, S3), only the membrane  
374 voltage, but not the  $\text{Na}^+$  concentrations, were varied. *In vivo*, the movement of the  $\text{Na}^+$  ion  
375 would be driven both by the voltage on the cellular membrane  $\Delta\psi$  ( $\sim -100$  mV) and  
376 concentration difference of  $\text{Na}^+$  ( $140$  mM outside *versus*  $< 10$  mM inside). By analogy with  
377 the proton-motive force introduced by Mitchell for describing the proton-motive energy  
378 conversion [55], the corresponding sodium-motive force (*smf*), in the case of  $\text{Na}^+$ -  
379 translocating membrane enzymes, could be defined as

380

$$381 \quad smf = -\Delta\psi + \frac{2.3RT}{F} \lg \frac{[Na^+]_{out}}{[Na^+]_{in}} = -\Delta\psi + \frac{2.3RT}{F} \Delta pNa,$$

382

383 where  $2.3RT/F$  is 59.1 mV at 298°K [56].

384 In case of GPCRs, the value of  $smf$  would depend on the extent of the coupled  
385 transmembrane charge transfer. After the escape of the  $Na^+$  ion into the cytoplasm, the  
386 Asp2.50 residue is unlikely to stay deprotonated and negatively charged in the middle of the  
387 membrane, it would rather accept a proton from the external medium [37]. The corresponding  
388 displacement of a proton would be driven by membrane voltage; it, however, could be either  
389 coupled to the activation of the receptor or not. If proton displacement uncoupled (e.g.  
390 because protonation of Asp2.50 is slow and happens after the activation of the GPCR), the  
391 amount of free energy derived from the  $Na^+$  translocation could be estimated as ( $\sim -\Delta\psi(1 -$   
392  $\theta) + \frac{2.3RT}{F} \Delta pNa$ ) or  $\sim 120$  meV. As it follows from Fig. 2C, the  $smf$  of 120 meV, at  $\delta \gg 1.0$ ,  
393 would increase the receptor sensitivity up to an order of magnitude. If the reprotonation of  
394 Asp2.50 is coupled to the activation, as argued by Vickery and colleagues [37], the respective  
395  $smf$  of  $\sim 170$  mV ( $\sim -\Delta\psi + \frac{2.3RT}{F} \Delta pNa$ ) could increase the sensitivity by almost two orders of  
396 magnitude (see Fig. 2C). Furthermore, reprotonation of Asp2.50 could be productive in some  
397 GPCRs and futile in other GPCRs contributing to the variations of voltage effects, as  
398 reviewed in [37, 39].

399 Our modeling of experimental data (Fig. 3 and S3) supports the idea that  $Na^+$ -translocating  
400 GPCRs, when operating in the carrier-on mode, could use the energy of the transmembrane  
401 electric field to amplify the signal. Devices that use the energy of external electric field to  
402 amplify a weak signal are called field effect transistors.

403 Additionally, the same electric field, by preventing the escape of the bound  $Na^+$  ion to the  
404 extracellular side and stabilizing the inactive conformation, would decrease the noise in the  
405 absence of agonist. Hence,  $Na^+$ -dependent GPCRs can work as electrochemical field effect  
406 transistors in which the electric field is additionally used to suppress the noise.

407 There are even more benefits from coupling translocation of the  $Na^+$  ion with receptor  
408 activation. Since the equilibrium constant between the active and inactive states of GPCRs is  
409 low (Table 1), the equilibrium, in principle, could be shifted towards the active state in  
410 multiple ways in response to binding of various ligands to different patches in the ligand-  
411 binding pocket. The above-described amplification mechanism, however, would be involved



412 only when the binding of an agonist molecule would prevent the retreat of the Na<sup>+</sup> ion into  
413 the extracellular media upon activation [26]. The Na<sup>+</sup> binding site is connected with the  
414 extracellular space by a polar cavity (Fig. 1A, B), so that the retreat of a Na<sup>+</sup> ion through this  
415 cavity upon activation is mechanistically easier than its corkscrewing in the opposite  
416 direction through the layer of hydrophobic residues - unless the agonist binds in such a  
417 specific way that the retreat of the Na<sup>+</sup> ion is blocked and it is forced to escape in the opposite  
418 direction. Apparently, only some specific modes of agonist binding would prevent the retreat  
419 of the Na<sup>+</sup> ion and thus enable the coupling between its electrogenic translocation into the  
420 cell and the receptor activation. The signal of such agonist molecules would be amplified by  
421 electric field (carrier-on mode), whereas the signal of other, e.g. partial agonists would be  
422 weakened by the field (carrier-off mode), which would dramatically increase the chemical  
423 selectivity of the receptor.

424 It could be anticipated that the endogenous agonists of studied GPCRs should be among those  
425 effectors whose signals are amplified by membrane voltage. Indeed, in the muscarinic  
426 acetylcholine receptor M<sub>2</sub>, the membrane voltage potentiated the signal from the endogenous  
427 full agonist acetylcholine, but decreased the signal from the drug pilocarpine, a partial  
428 agonist, see Table S1, Fig. S3 and [57, 58]. Additionally, the voltage sensitivity of the M<sub>2</sub>  
429 receptor was shown to be altered by mutations in the orthosteric ligand-binding site,  
430 indicating a direct connection between the agonist binding and voltage effects [57].

431 In the case of the muscarinic acetylcholine receptor M<sub>3</sub>, the membrane voltage increased the  
432 sensitivity to full agonists acetylcholine (endogenous) and carbachol (artificial), but  
433 decreased the sensitivity to choline or pilocarpine, see Table S1, Fig. 3B and [49]. In support  
434 of their suggestion that voltage-sensitivity is defined by the specific binding mode of each  
435 signaling molecule to the receptor, Rinne and coworkers have shown that the replacement of  
436 Asn6.52 in the M<sub>3</sub> receptor by Gln reversed the voltage effect in case of the artificial agonist  
437 carbachol but did not affect the behavior of the endogenous agonist acetylcholine [49]. The  
438 authors concluded that their data buttress the importance of the 6<sup>th</sup> helix for the mechanics of  
439 acetylcholine receptors.

440 Similarly, membrane voltage increased the sensitivity of dopamine D<sub>2S</sub> receptor to its native  
441 agonist dopamine, but decreased the sensitivity to β-phenethylamine, *p*- and *m*-tyramine, see  
442 Table S1 and [59-61].

443 By contrast, activation of the muscarinic acetylcholine receptor  $M_1$  both by endogenous  
444 agonist acetylcholine and artificial agonist carbachol was depressed by membrane voltage,  
445 see Fig. 3C and Table S1. This behavior could be better described by the carrier-off mode,  
446 where the  $Na^+$  ion retreats into the extracellular medium upon activation. It appears that the  
447  $M_1$  receptor does not translocate  $Na^+$  even in the presence of its endogenous agonist, which  
448 may have sense if the activity of this receptor is suppressed by membrane voltage.

449 Finally, Table S1 also reports several cases where receptors were insensitive to membrane  
450 voltage. Mechanistically, this could happen if the displacement of the  $Na^+$  ion - in either  
451 direction - is uncoupled from the activation ( $\delta \ll 1.0$ ). For instance,  $Na^+$  ion could retreat  
452 before the major conformational change/activation occurs.

453 In summary, the suggested model allowed us to qualitatively describe the data on voltage  
454 dependence of several  $Na^+$ -dependent GPCRs by using the same set of fixed parameters for  
455 receptor activation and by varying only the affinities to the agonist and the  $Na^+$  ion. It appears  
456 that the translocation of a  $Na^+$  ion across the membrane and into the cytoplasm concomitantly  
457 with the receptor activation increases both the sensitivity and selectivity of GPCRs.

458

## 459 *2. Structural elements of the coupling mechanism*

460 Here we argue that the  $Na^+$  ion serves as the physical moiety that couples the GPCR with the  
461 external electrochemical gradient by pushing, as a cannon ball, through the layer of  
462 hydrophobic residues and promoting the conformational change in the receptor. To identify  
463 the structural aspects of the coupling mechanism, we superposed crystal structures of the  
464 muscarinic acetylcholine receptor  $M_2$  in its inactive state (PDB entry 3UON [14]) and in the  
465 active state (PDB: 4MQT [13]), see Fig. 1C. This pair of structures was chosen because of  
466 the clear-cut differences between the inactive and active structures [13, 62] and the reported  
467 voltage dependence of muscarinic receptors, see Table S1, Fig. S3 and [51, 52, 63]. The  
468 results of our analysis, however, should also be applicable to other Class A GPCRs because  
469 of the high sequence identity of the regions surrounding the sodium ion among the members  
470 of this class [26]. They share, for example, motifs LxxxD in helix 2, DRY in helix 3, WxP in  
471 helix 6, and NPxxY in helix 7, see Fig. 1C,D and [64-66]. Fig. 1D shows the positions of  
472 these motifs, whereas Table 3 reports the extent of their conservation.

473

474 **Table 3. Conservation of functionally important residues in Class A GPCRs.**

| Residue in M <sub>2</sub> muscarinic acetylcholine receptor (PDB: 3UON) | Generic number | Most common residue |    | Second most common residue |     | Residue type, % |
|-------------------------------------------------------------------------|----------------|---------------------|----|----------------------------|-----|-----------------|
|                                                                         |                | AA                  | %  | AA                         | %   |                 |
| Na <sup>+</sup> coordination                                            |                |                     |    |                            |     |                 |
| Asn41                                                                   | 1.50           | N                   | 98 | S                          | 1   | Polar, 100      |
| Asp69                                                                   | 2.50           | D                   | 92 | N                          | 3   | Polar, 98       |
| Ser110                                                                  | 3.39           | S                   | 72 | T                          | 8   | Polar, 83       |
| Trp400                                                                  | 6.48           | W                   | 68 | F                          | 16  | Aromatic, 87    |
| Asn432                                                                  | 7.45           | N                   | 67 | S                          | 11  | Polar, 93       |
| Ser433                                                                  | 7.46           | S                   | 64 | C                          | 13  | Polar, 72       |
| WxP motif                                                               |                |                     |    |                            |     |                 |
| Thr399                                                                  | 6.47           | C                   | 71 | S                          | 10  | Small, 86       |
| Trp400                                                                  | 6.48           | W                   | 68 | F                          | 16  | Aromatic, 87    |
| Pro402                                                                  | 6.50           | P                   | 99 | N/A                        | N/A | Helix kink, 99  |
| Hydrophobic shell around the Na <sup>+</sup> pocket                     |                |                     |    |                            |     |                 |
| Leu65                                                                   | 2.46           | L                   | 90 | M                          | 4   | Hydrophobic, 99 |
| Val111                                                                  | 3.40           | I                   | 40 | V                          | 24  | Hydrophobic, 88 |
| Leu114                                                                  | 3.43           | L                   | 73 | I                          | 10  | Hydrophobic, 98 |
| Ile117                                                                  | 3.46           | I                   | 56 | L                          | 16  | Hydrophobic, 99 |
| Ile392                                                                  | 6.40           | V                   | 37 | I                          | 28  | Hydrophobic, 93 |
| Leu393                                                                  | 6.41           | V                   | 41 | L                          | 20  | Hydrophobic, 91 |
| Phe396                                                                  | 6.44           | F                   | 75 | V                          | 4   | Hydrophobic, 92 |
| Second hydrophobic shell                                                |                |                     |    |                            |     |                 |
| Val44                                                                   | 1.53           | V                   | 65 | A                          | 14  | Hydrophobic, 92 |
| Ile62                                                                   | 2.43           | L                   | 36 | I                          | 35  | Hydrophobic, 97 |
| Trp148                                                                  | 4.50           | W                   | 96 | F                          | 1   | Hydrophobic, 99 |
| Pro198                                                                  | 5.50           | P                   | 79 | V                          | 5   | Hydrophobic, 95 |
| Met202                                                                  | 5.54           | I                   | 33 | M                          | 30  | Hydrophobic, 90 |
| Tyr206                                                                  | 5.58           | Y                   | 72 | S                          | 5   | Hydrophobic, 86 |
| Ile389                                                                  | 6.37           | L                   | 38 | V                          | 21  | Hydrophobic, 91 |
| NPxxY motif                                                             |                |                     |    |                            |     |                 |
| Asn436                                                                  | 7.49           | N                   | 72 | D                          | 20  | Polar, 98       |
| Pro437                                                                  | 7.50           | P                   | 94 | A                          | 2   | Hydrophobic, 98 |
| Tyr440                                                                  | 7.53           | Y                   | 89 | F                          | 4   | Aromatic, 93    |
| DRY motif (ionic lock)                                                  |                |                     |    |                            |     |                 |
| Asp120                                                                  | 3.49           | D                   | 64 | E                          | 21  | Polar, 97       |
| Arg121                                                                  | 3.50           | R                   | 95 | H                          | 1   | Polar, 98       |
| Tyr122                                                                  | 3.51           | Y                   | 66 | F                          | 10  | Aromatic, 87    |

475 Residue conservation is calculated from the alignment of human Class A (Rhodopsin-like) GPCRs in the  
 476 GPCRdb database [67] (not including olfactory receptors). Locations of the functionally relevant residues in the  
 477 protein structure are shown in Fig. 1.

478 The crystal structures of the muscarinic acetylcholine receptor  $M_2$  in the active and inactive  
479 state (Fig. 1A-C) differ in the conformation of helix 6 and, specifically, positions of Trp400  
480 (6.48), Leu65 (2.46) and the residues of the NPxxY motif (Fig. 1C, residue numbers for the  
481 PDB entry 4MQT). In the inactive state of the  $M_2$  receptor, a large cavity above the sodium  
482 site connects it with the extracellular space, while the cytoplasmic cavity protracts only up to  
483 the residues of the NPxxY motif. As discussed earlier [24, 36, 37, 68, 69], the connection  
484 between the two cavities is blocked by a layer of hydrophobic residues. In Fig. 1, this  
485 hydrophobic layer contains Leu65 (2.46), Leu114 (3.43), Val111(3.40), Ile117(3.46),  
486 Ile392(6.40), Leu393(6.41) and Phe396(6.44) (Fig. 1C,D). These hydrophobic residues in  
487 helices 2, 3 and 6 were previously implicated in controlling the activation-related  
488 conformational changes [24, 36, 37, 68, 69]. Most of these residues are conserved in class A  
489 GPCRs (Table 3). The above-listed residues of the hydrophobic barrier are supported  
490 structurally by a second shell of conserved hydrophobic residues: Val44(1.53), Ile62(2.43),  
491 Trp148(4.50), Pro198(5.50), Met202(5.54), Tyr206(5.58), and Ile389(6.37). These residues  
492 appear to be functionally important: their positions are almost always taken by hydrophobic  
493 residues in the class A GPCRs, and in many cases not just the hydrophobic nature, but even  
494 the specific residue types are highly conserved (see Table 3).

495 In Fig. 1, the hydrophobic layer is centered on Leu65 (Leu2.46) of the conserved LxxxD  
496 motif. Leucines in a helix generally prefer one of two rotamers [70], and a rotamer search for  
497 Leu2.46 reveals two clearly preferred rotamers at this position (Fig. S4A). After  
498 reinterpretation of the X-ray data of the PDB entry 3UON by the PDB\_REDO team [71],  
499 Leu2.46 adopts the conformation shown in Fig. 4A and S4B, which corresponds to the lower  
500 of the two preferred rotamers in Fig.S4A. The upper of the two rotamer positions is not  
501 available to Leu2.46 in the 3UON structure because the Leu side chain would clash with  
502 Asp2.50 and Tyr7.53. Notably, in the active structure of the same receptor (PDB: 4MQT),  
503 Leu2.46 is observed in the upper rotamer, see Fig. 1C, S4C. If Leu2.46 is placed in the upper  
504 rotamer in the structure of the inactive receptor as envisioned in Fig. 4B and S4D, the two  
505 cavities get connected, indicating that water and small ions could freely traverse the GPCR  
506 helix bundle. Hence, formation of a passage for a  $Na^+$  ion requires releasing the steric  
507 hindrances by Asp2.50 and Tyr7.53, which prevent rotation of Leu2.46 into the upper  
508 rotamer position.

509

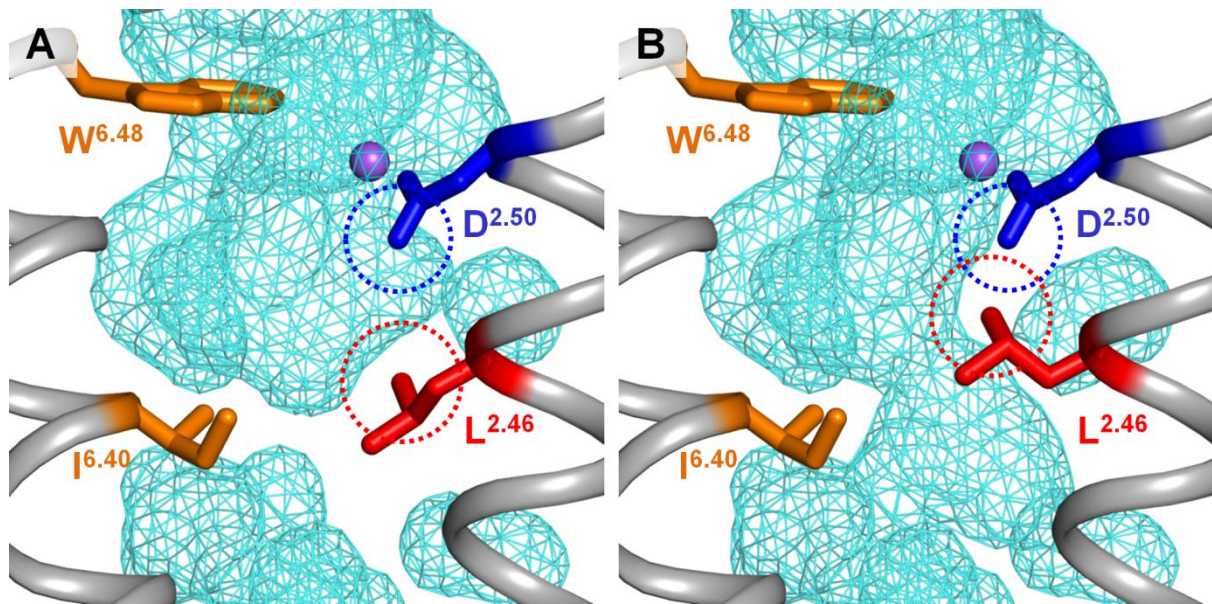

510

511 **Figure 4. Suggested pathways of Na<sup>+</sup> escape to the cytoplasm upon GPCR activation in the**  
512 **muscarinic acetylcholine receptor M<sub>2</sub>.**

513 The protein is shown in gray, Na<sup>+</sup> ion is in purple, solvent-accessible surface with solvent radius 1.12  
514 Å (corresponding to the Na<sup>+</sup> ion) is shown as blue mesh. **A.** Sodium-binding cavity in the M<sub>2</sub> receptor  
515 in the antagonist-bound inactive state (PDB 3UON). **B.** A minor rotameric transition of Leu2.46 alone  
516 is enough to open the connection between two inner cavities, allowing the Na<sup>+</sup> ion passage through  
517 the layer of conserved hydrophobic residues (see also Fig. S4). The dashed circles mark the Van der  
518 Waals radii as calculated by the PyMol v 1.7 software [72].

519

520 A minor rotameric transition of the strictly conserved Leu2.46 can open a conduit for  
521 voltage-driven translocation of Na<sup>+</sup> ion into the cell (Fig. 4, S4). Leu2.46 and Asp2.50 form  
522 the highly conserved motif LxxxD in helix 2, (Table 3, Fig. 6) where Asp2.50, owing to its  
523 negative charge, is the strongest ligand of the Na<sup>+</sup> ion. While Asp2.50 serves as a Na<sup>+</sup> ligand,  
524 Leu2.46 controls the interface between helices 2 and 3. In the NR, the transmembrane ion  
525 passage is formed by helices 3, 6 and 7 [7, 73, 74] and is likely to be contributed by same  
526 helices in GPCRs [7, 24, 26]. Based on the structure analysis (Fig. 4, S4), we suggest that the  
527 rotameric change of Leu2.46 upon GPCR activation plays a key role in coupling the voltage-  
528 driven Na<sup>+</sup> translocation into the cell with the activation of GPCRs.

529 Numerous alanine screening experiments, performed on different GPCRs, showed an altered  
530 function in Leu2.46 mutants, see e.g. [75]. The results of such experiments, however, are  
531 difficult to interpret. If Leu2.46 is indeed, as we suspect, involved in the coupling of GPCR  
532 activation with Na<sup>+</sup> translocation, then its replacement would affect both these processes with  
533 an unpredictable outcome for the function. More informative is the observation, obtained  
534 upon alanine scanning of the human adenosine A<sub>2A</sub> receptor, that the mutation of Leu2.46 to

535 Ala (L48A) dramatically increased the thermostability of the receptor [76]. The temperature  
536  $T_m$  at which 50% of the solubilized receptor could bind ligand after 30 min thermo-  
537 incubation increased from 28.5°C in the wild-type protein to 42.5°C in the Leu2.46Ala  
538 mutant. The two second-best mutations increased  $T_m$  only to 34.5°C. The L48A mutation  
539 apparently fixed the human adenosine  $A_{2A}$  receptor in a (thermo)stable, active conformation  
540 [76].

541 Poor stability is a common property of GPCRs, which hindered their crystallization for  
542 several decades. This instability is an intrinsic property; the sensitivity of GPCRs is  
543 determined by their ability to switch between two different conformations with similar  
544 energies. Dramatic stabilization of the active conformation of  $A_{2A}$  receptor after replacing  
545 Leu2.46 by the smaller Ala indicates that the conformation of the bulky hydrophobic side  
546 chain of Leu2.46 is indeed keeping the balance between the active and inactive  
547 conformations by serving as an important "weak spot" [77]. At the same time, Leu2.46  
548 appears to control the  $Na^+$  path (see Fig. 4, S4), which points to this strictly conserved residue  
549 as the key coupling moiety in GPCRs.

550 The coupling between the electrogenic  $Na^+$  translocation and GPCR activation would be  
551 achieved if the agonist binding decreases the affinity of GPCR for the  $Na^+$  ion. Indeed,  
552 keeping the  $Na^+$  ion in the middle of the hydrophobic membrane is energetically very  
553 demanding because of the high desolvation penalty for a positively charged small cation [78].  
554 In the well-studied  $Na^+$ -dependent ATP synthases, binding of the  $Na^+$  ion in the middle of the  
555 membrane requires six ligands [79, 80]; a loss of even one of them transforms a  $Na^+$ -  
556 translocating enzyme into a proton-translocating one [79, 81]. The detachment of  $Na^+$  from  
557 its binding site could be mediated by Trp6.48. This residue is strictly conserved in most class  
558 A GPCRs (Table 3) and changes its conformation in response to agonist binding, see Fig. 1C  
559 and [2, 9, 19-25]. Specifically, in the structure of the  $\delta$ -opioid receptor (PDB: 4N6H)  
560 Trp274(6.48) interacts with the  $Na^+$  ion via a water molecule [7, 15]; same interaction can be  
561 seen in structures of  $A_{2A}$  adenosine receptor (PDB 4EIY) and  $\beta_1$ -adrenoceptor (PDB 5A8E).  
562 In all likelihood, Trp6.48 participates in a hydrogen-bonded network also in other class A  
563 GPCRs. If the system of bonds around the  $Na^+$  ion gets destabilized in response to the ligand  
564 binding, the further stay of the  $Na^+$  ion in the middle of the membrane would not be possible.  
565 If the retreat path is blocked by the bound agonist, the  $Na^+$  ion would swing in the pocket  
566 until, being pushed by electric field, it enforces the twist of Leu2.46 residue into the upper  
567 rotamer. This rotameric transition demands, however, to resolve the steric clash with Asp2.50

568 that is located just one helix turn away (Fig. 4B). Asp2.50 is engaged in binding of Na<sup>+</sup> ion  
569 and would not get aside as long as the Na<sup>+</sup> ion stays bound. Hence, the breakage of the bond  
570 between the Na<sup>+</sup> ion and Asp2.50 is a precondition of the isomeric transition of Lys2.46 and  
571 opening of the cytoplasmic Na<sup>+</sup> conduit (carrier-on operation mode, Fig. 2C, 3A, B).  
572 Alternatively, the Na<sup>+</sup> ion could retreat, against the electric field, into the extracellular space.  
573 In this case, the electric field would prevent, rather than promote, the GPCR activation  
574 (carrier-off mode, Fig. 2D, 3C). After the escape of the Na<sup>+</sup> ion, Tyr7.53 makes a new  
575 hydrogen bond, via a water bridge (with Tyr5.58 in mammals), whereas the Asn7.49 residue  
576 of the NPxxY motif turns towards Asp2.50 and forms a new, alternative hydrogen bond  
577 network, which is seen in the "active" crystal structures (Fig. 1B, 1C) [22-24]. These new  
578 hydrogen bonds prevent the return of the Na<sup>+</sup> ion and stabilize the active conformation of the  
579 receptor, which is accompanied by displacement of several TM helices and closing of the  
580 Na<sup>+</sup>-binding pocket and of the cytoplasmic Na<sup>+</sup> path (Fig. 1B, S4C). As a result, the escape of  
581 the Na<sup>+</sup> ion gets thermodynamically coupled with the GPCR activation.

582 Our structural inspection of cavities in GPCRs showed that the Na<sup>+</sup> ion might escape from  
583 the helical bundle of GPCR either after reaching the water phase from the cytoplasmic side  
584 (dashed line in Fig. 5A) or, even earlier, by slipping between helices 2 and 3 at the level of  
585 the DRY motif (dashed line Fig. 5B). In the latter case, the Na<sup>+</sup> ion would be released into the  
586 layer of phosphate groups of phospholipids. Their negative charges, serving as potent  
587 alternative Na<sup>+</sup> ligands, could attract the Na<sup>+</sup> ion and help it to slide between the helices. For  
588 the Na<sup>+</sup> ion, in fact, there is no need to get any further. Molecular dynamics simulations of  
589 phospholipid membranes showed that Na<sup>+</sup> ions reside among the phosphate groups and  
590 compensate their negative charges [82].

591 We have observed a continuous path for the Na<sup>+</sup> ion only when the GPCR is in the *inactive*  
592 conformation and Leu2.46 is in the upper rotamer typical for the *active* conformation (Fig.  
593 4B, S4D), which explains why the path is not seen either in the active or in inactive structures  
594 (Fig. 1, 4A, S4B, C). Owing to the constriction by the second shell of hydrophobic residues  
595 (Table 3, Fig. 1D), the probability of a spontaneous opening of the path should be low, which  
596 might explain the relatively high activation energy of the conformational change in GPCRs  
597 [20, 47, 48]. Otherwise, Na<sup>+</sup> ions would constantly leak through GPCRs. While the  
598 importance of Asp2.50, Trp6.48 and Tyr7.53 for activation of GPCRs and formation of a  
599 Na<sup>+</sup>-translocating passage has been widely discussed, see e.g. [2, 22-24, 36, 37], the control  
600 function of Leu2.46, to our knowledge, has not been specifically addressed until now.

601

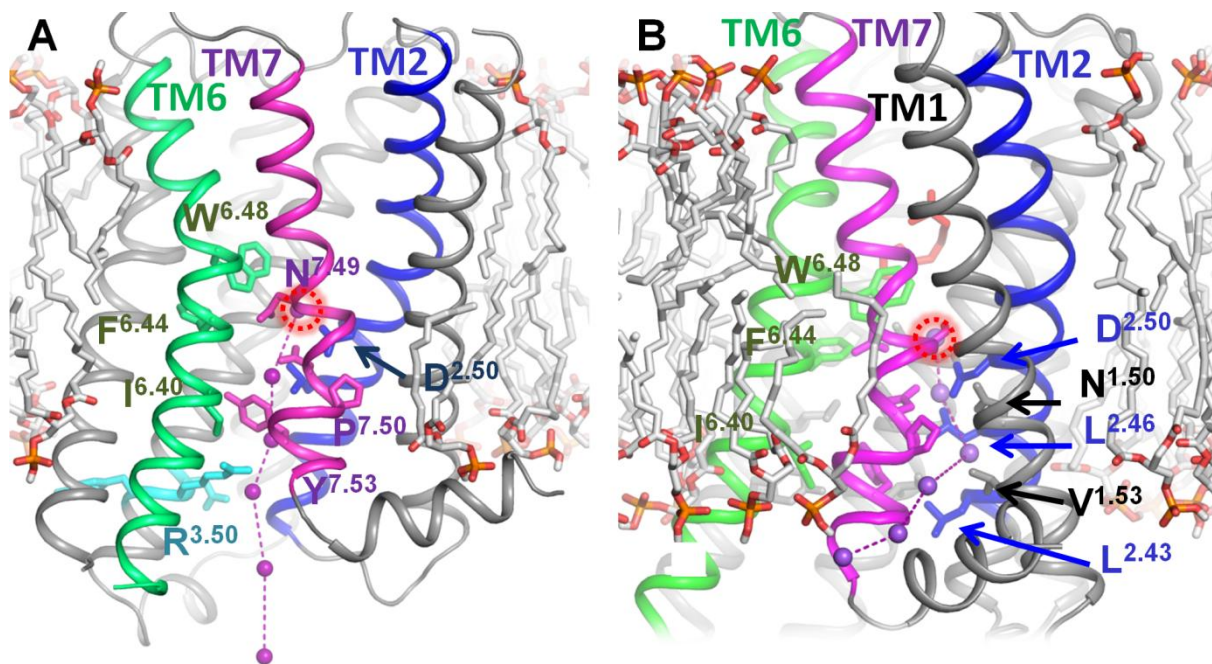

602

603

**Figure 5. Suggested pathways of Na<sup>+</sup> escape to the cytoplasm upon GPCR activation, based on the structure of the M<sub>2</sub> receptor (PDB: 4MQT).**

604

**A.** Putative exit pathway for the Na<sup>+</sup> ion via the center of the heptahelical bundle. **B.** An alternative

606 exit pathway via the pocket between helices 1, 2, and 7. Hypothetical intermediate positions of the

607 Na<sup>+</sup> ion are shown as purple spheres; the initial position, inferred from the position of Na<sup>+</sup> in the

608 structures of inactive GPCRs, is indicated by the red dashed circle. Helices 2, 6, and 7 are colored

609 blue, green and purple, respectively; conserved residues listed in Table 3 are shown as sticks. The

610 ionic lock residues are shown in cyan. CHARMM-GUI software [83] was applied to construct the

611 lipid molecules of the membrane surrounding the receptors (shown as grey sticks).

612

613

### 614 3. Evolutionary considerations:

615 Earlier, the structure superposition of the Na<sup>+</sup>-translocating rhodopsin from *Dokdonia eikasta*

616 (NR), and Na-bound GPCRs allowed us to produce a structure-guided alignment of MRs and

617 GPCRs and to suggest the emergence of GPCRs from Na<sup>+</sup> translocating MRs [7]. Here we

618 have updated this alignment by including the natural (not chimeric) channelrhodopsin 2, the

619 structure of which was recently resolved [84] (ChR2, Fig. S5). As seen in Fig. S5, the Na<sup>+</sup>-

620 coordinating residues of GPCRs correspond to the ion-coordinating residues from both NR

621 and ChR2. The pivot Trp6.48 residue of the conserved WxP motif remains the only

622 conserved residue between GPCRs and MRs, in agreement with the movement of the

623 cytoplasmic half of helix 6 as the major conformational change both in MRs [85-87] and

624 GPCRs [2, 9, 10, 20]. In addition to the previously reported similarities with NR, the updated

625 alignment shows that Asp2.50 of GPCRs corresponds to a glutamate residue in helix 2 of

626 ChR2, whereas the strictly conserved Trp4.50 of GPCRs is matched by a Trp residue in



627 ChR2 (Fig. S5). The conservation patterns for functionally important residues between NR  
628 and GPCRs, on one hand, and ChR2 and GPCRs, on the other hand, overlap only partially  
629 (Fig. S5). It appears that the Na<sup>+</sup>-translocating, MR-type ancestors of GPCRs could have  
630 combined features of NR and ChR2.

631 As discussed previously [7], the original Na<sup>+</sup>-translocating MR could have evolved into an  
632 ancestral GPCR after losing its retinal moiety. A bound Na<sup>+</sup> ion could stabilize the helical  
633 bundle after the loss of the retinal. Formation of a permanent binding site for the Na<sup>+</sup> ion  
634 within an MR is quite feasible. Balashov and colleagues, by substituting Glu for Asp251 in  
635 the NR of *Gillisia limnaea* (which approx. corresponds to the Na<sup>+</sup> ligand Asn7.45 of GPCRs,  
636 see Fig. 1, 4, S4 and Table 3), were able to create a high-affinity binding site for the Na<sup>+</sup> ion  
637 in the middle of the membrane [88].

638 The structural similarity between GPCRs and ChR2 implies possible similarities in their  
639 mechanisms. It was shown that photoactivation of ChR was coupled not only with the motion  
640 of helix 6, but also with a rotation of helix 2 [87]. Hence, the functional mobility of helix 2,  
641 which carries the LxxxD motif, may also have been inherited from MRs.

642 The elements of above-described coupling machinery, including an Asp residue in the middle  
643 of the helix 2, could be seen already in representative GPCR-like proteins of early-branching  
644 eukaryotes, such as Protozoa, primitive Metazoa and plants, which are aligned in Fig. 6.  
645 Here, an Asp residue in the position that corresponds to Asp2.50 of class A GPCRs can be  
646 considered an indication of the presence of a Na<sup>+</sup>-binding site. Otherwise, maintaining an  
647 Asp residue in the middle of the membrane would be energetically costly and this Asp would  
648 be prone to be lost in the course of evolution, as discussed below. As follows from Fig. 6,  
649 early-branching GPCR-like proteins with a counterpart of Asp2.50 often have potential Na<sup>+</sup>  
650 ligands also in the positions of other Na<sup>+</sup> ligands of class A GPCRs.

651 The suggested key role of Leu2.46 in controlling GPCR activation is supported not only by  
652 its already mentioned high degree of conservation within class A GPCRs (90%, see [36, 64]  
653 and Table 3), but also by its conservation within all GPCR-like proteins, even those lacking  
654 Asp2.50 (Fig. 6), which is unusual for a hydrophobic residue and indicates that the shape of  
655 the side chain of Leu2.46 is particularly important. Trp6.48, the only residue that is conserved  
656 between MRs and GPCRs (Fig. S5), is highly but not universally conserved within GPCRs: it  
657 is replaced by Tyr in some Alveolata and by Phe in the protease-activated receptor 1 (PAR1)  
658 of Metazoa. In addition to Leu2.46, hydrophobic/aromatic residues are well conserved in the

659 positions 3.40, 3.46, 6.40 and 6.44, which correspond to the hydrophobic core of class A  
660 GPCRs, see Table 3 and *cf.* Fig. 1D and 6. Residues Asn7.49 and Tyr7.53 from the NPxxY  
661 motif are all highly conserved. Finally, the characteristic motif DRY of the TM3 is absent in  
662 plants and most protozoa.

663 Hence, sequence comparisons of animal class A GPCRs with evolutionarily oldest, Na<sup>+</sup>-  
664 binding, GPCR-like proteins (Fig. 6) support our suggestion on the importance of Leu2.46,  
665 Asp2.50, Trp6.48, Asn7.49, Tyr/Phe7.53 and the set of tightly packed, conserved  
666 hydrophobic residues for the function of Na<sup>+</sup>-binding GPCRs and, specifically, for the  
667 coupling between their activation and Na<sup>+</sup> translocation. In contrast, the DRY motif is absent  
668 from the sequences of GPCRs from plants and Alveolata and appears to be a somewhat later  
669 acquisition.

670 Our inspection showed that eukaryotic genomes contain numerous GPCR-like sequences,  
671 both with and without counterparts of Asp2.50. The latter sequences (some are shown in Fig.  
672 6) most likely belong to GPCRs that cannot bind the Na<sup>+</sup> ion. Presence of other Na<sup>+</sup> ligands  
673 in many such sequences suggests that they could have lost their Na<sup>+</sup> binding capability in the  
674 course of their evolution. Loss of Na<sup>+</sup> binding in the course of GPCR evolution would not  
675 necessarily lead to the loss of function; the ability to shift between the active and inactive  
676 conformation in response to agonist binding could still be retained. Those residues that  
677 appear to form the mechanistic core of the coupling/activating mechanism in GPCRs are  
678 mostly conserved also in those GPCRs lacking a counterpart of Asp 2.50. Even without a  
679 bound Na<sup>+</sup> ion, a GPCR could be driven by voltage if its activation is coupled with proton  
680 translocation across the membrane [89], e.g. via former Na<sup>+</sup> ligands. However, in the absence  
681 of a Na<sup>+</sup>-binding site, such GPCRs would be unable to (i) suppress the noise by binding a Na<sup>+</sup>  
682 ion, (ii) exploit the concentration gradient of Na<sup>+</sup> ions for increasing their sensitivity and (iii)  
683 boost their selectivity by specifically amplifying the signal in response to endogenous  
684 agonists.

685

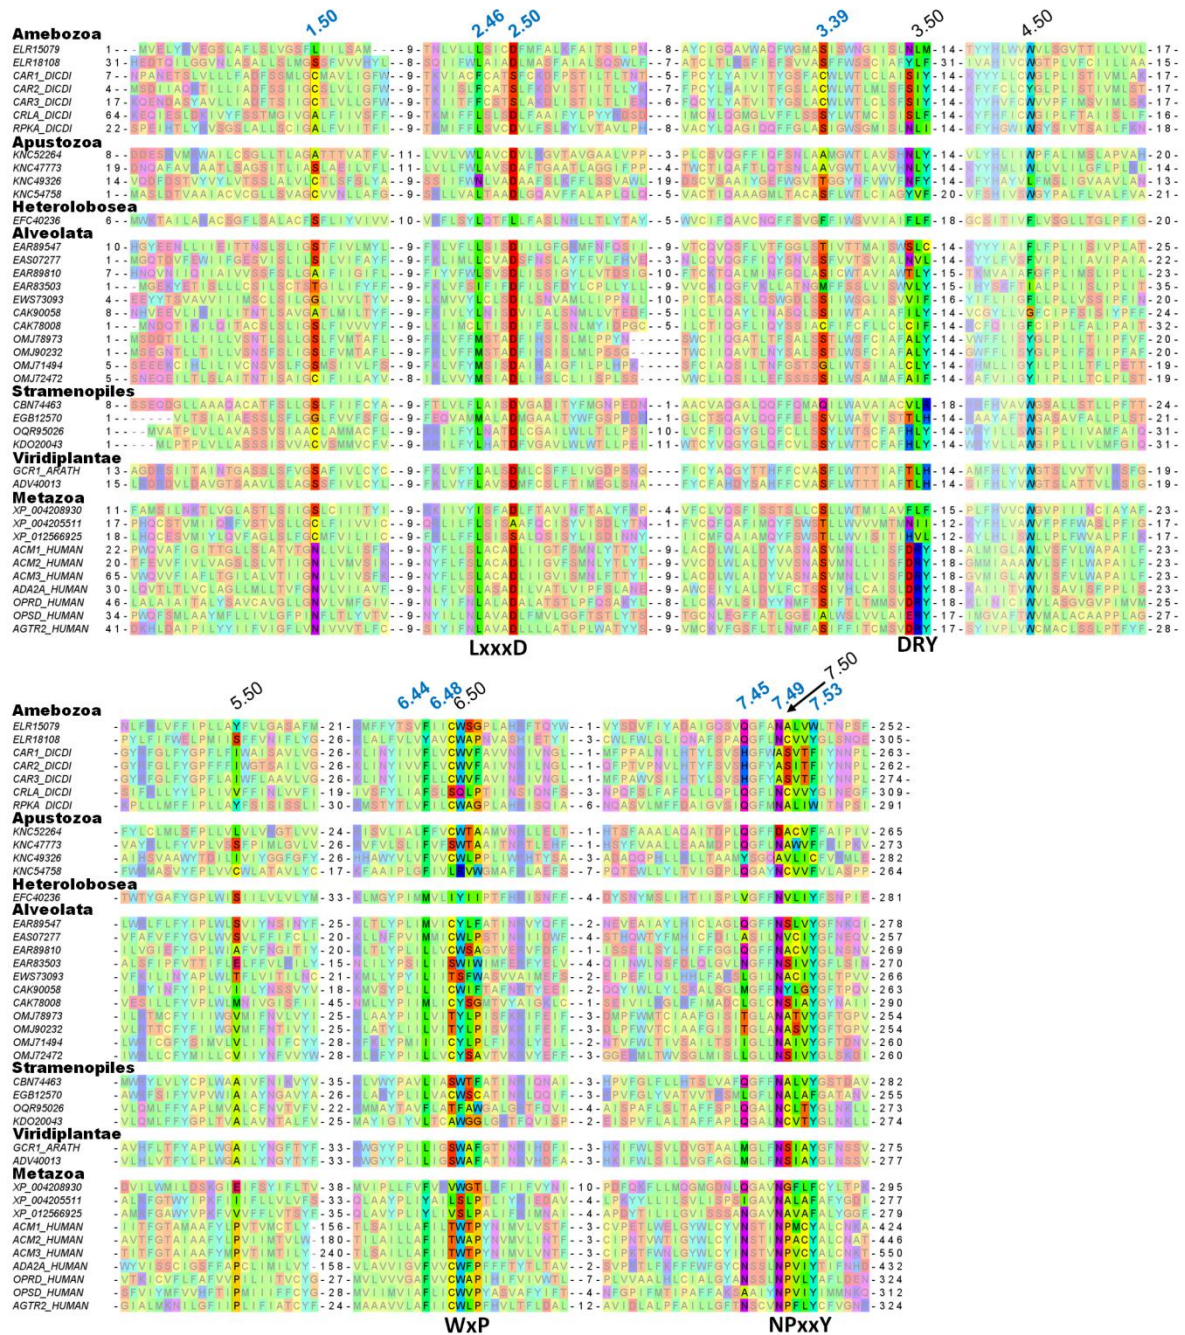

686  
 687  
 688  
 689  
 690  
 691  
 692  
 693  
 694  
 695  
 696  
 697  
 698  
 699  
 700  
 701  
 702

**Figure 6. Alignment of diverse GPCRs with human class A GPCR.** The top line shows Ballesteros–Weinstein numbering of the residues [17, 18] as given in GPCRdb [67] for the Class A GPCRs. Generic numbers of residues involved in the Na<sup>+</sup> ion binding pocket are shown in blue. Sequences are listed under their GenBank, UniProt or RefSeq accessions and are as follows: Amebozoa: phosphatidylinositol 4-phosphate 5-kinase protein from *Acanthamoeba castellanii* (GenBank: ELR15079); cAMP receptor protein from *Acanthamoeba castellanii* (GenBank: ELR18108); cAMP receptor 1 from *Dictyostelium discoideum* (UniProt: CAR1\_DICDI); cAMP receptor 2 from *Dictyostelium discoideum* (UniProt: CAR2\_DICDI); cAMP receptor 3 from *Dictyostelium discoideum* (UniProt: CAR3\_DICDI); cAMP receptor-like protein from *Dictyostelium discoideum* (UniProt: CRLA\_DICDI), and G-protein-coupled receptor family protein from *Dictyostelium discoideum* (UniProt: RPKA\_DICDI). Apustozoa: hypothetical protein MSG\_01092 from *Thecamonas trahens* (GenBank: KNC52264); hypothetical protein MSG\_04000 from *Thecamonas trahens* (GenBank: KNC47773); hypothetical protein MSG\_02398 from *Thecamonas trahens* (GenBank: KNC54758); PPK-1 protein from *Thecamonas trahens* (GenBank: KNC49326); hypothetical protein MSG\_01609 from *Thecamonas trahens* (GenBank: KNC54758). Heterolobosea: predicted protein NAEGRDRAFT\_72027 from *Naegleria gruberi* (GenBank: EFC40236). Alveolata: G protein coupled glucose receptor from *Tetrahymena thermophila* (GenBank: EAR89547); TTM secretin family protein from *Tetrahymena thermophila* (GenBank: EAR89547); TTM secretin family protein from *Tetrahymena thermophila* (GenBank: EAR89547).

703 EAS07277); 7TM secretin family protein from *Tetrahymena thermophila* (GenBank: EAR89810); G protein  
704 coupled glucose receptor from *Tetrahymena thermophila* (GenBank: EAR83503); cAMP receptor from  
705 *Tetrahymena thermophila* (GenBank: EWS73093); unnamed protein product from *Paramecium tetraurelia*  
706 (GenBank: CAK90058); hypothetical protein from *Paramecium tetraurelia* (Genbank: CAK78008);  
707 hypothetical protein SteCoe\_21100 from *Stentor coeruleus* (GenBank: OMJ78973); hypothetical protein  
708 SteCoe\_30276 from *Stentor coeruleus* (GenBank: OMJ71494); hypothetical protein SteCoe\_7430 from *Stentor*  
709 *coeruleus* (GenBank: OMJ90232); hypothetical protein SteCoe\_29065 from *Stentor coeruleus* (GenBank:  
710 OMJ72472). Stramenopiles: G-protein coupled receptor from *Ectocarpus siliculosus* (GenBank: CBN74463);  
711 hypothetical protein AURANDRAFT\_4432 from *Aureococcus anophagefferens*, partial (GenBank:  
712 EGB12570); hypothetical protein ACHHYP\_00504 from *Achlya hypogyna* (GenBank: OQR95026);  
713 hypothetical protein SPRG\_14191 from *Saprolegnia parasitica* (GenBank: KDO20043). Viridiplantae: G-  
714 protein coupled receptor 1 from *Arabidopsis thaliana* (UniProt: GCR1\_ARATH); G protein coupled receptor  
715 from *Oryza sativa* (GenBank: ADV40013). Metazoa: predicted probable G-protein coupled receptor 157 from  
716 *Hydra vulgaris*, partial (NCBI RefSeq: XP\_004208930); predicted cAMP receptor-like protein A from *Hydra*  
717 *vulgaris* (NCBI RefSeq: XP\_012566925); predicted G-protein coupled receptor 1-like protein from *Hydra*  
718 *vulgaris* (NCBI RefSeq: XP\_012566925); human muscarinic acetylcholine receptor M<sub>1</sub> (UniProt:  
719 ACM1\_HUMAN); human muscarinic acetylcholine receptor M<sub>3</sub> (UniProt: ACM3\_HUMAN); human  $\alpha_{2A}$   
720 adrenergic receptor (UniProt: ADA2A\_HUMAN); human  $\delta$ -type opioid receptor (UniProt: OPRD\_HUMAN);  
721 human visual rhodopsin (UniProt: OPSD\_HUMAN).

722  
723

724 The existence of both Na<sup>+</sup>-dependent and Na<sup>+</sup>-independent GPCRs deserves comparison with  
725 rotary ATP synthases, which can be driven either by protons or Na<sup>+</sup> ions [90]. While Na<sup>+</sup>-  
726 translocating ATP synthases are found only in some, mostly anaerobic prokaryotes [91], a  
727 comparative analysis has indicated their evolutionary primacy [79]. Apparently, in most  
728 lineages, the ability to bind and translocate Na<sup>+</sup> ions got lost; these enzymes, however,  
729 retained the ability to translocate protons, which became particularly beneficial after the  
730 oxygenation of atmosphere [92]. As already mentioned, holding a Na<sup>+</sup> ion in the middle of  
731 the membrane is structurally rather demanding. Therefore, it is tempting to speculate that  
732 more Na<sup>+</sup>-dependent GPCRs would be seen in organisms that need particularly sensitive and  
733 selective receptors for the active exploration of their environment. Indeed, Na<sup>+</sup>-dependent  
734 GPCRs are abundant not only in mammalian genomes, but also in genomes of primitive  
735 organisms known for their active behavior, such as free swimming, single-celled ciliates  
736 *Tetrahymena*, *Paramecium*, or *Stentor* (Fig. 6). For instance, the genome of *Stentor coeruleus*  
737 contains dozens of GPCR-encoding genes with a full set of Na<sup>+</sup> ligands.

738 The Ballesteros-Weinstein nomenclature [17, 18] used in this work attributes the index "50"  
739 to the amino acid residue that is the most conserved in each helix among class A GPCRs.  
740 Comparison of Table 3 with the multiple alignment in Fig. 6 shows that the "50<sup>th</sup>" residues,  
741 while strictly conserved among class A GPCRs, are often not conserved within a broader set  
742 of Na<sup>+</sup>-binding GPCRs. Proline residues 5.50, 6.50 and 7.50, which are strictly conserved  
743 within class A GPCRs, are not conserved in receptors of primitive organisms (Fig. 6). It  
744 appears that the acquisition of additional proline residues in transmembrane helices could  
745 contribute to the success and proliferation of class A GPCRs. These proline residues could

746 form the mechanistic scaffold of class A GPCRs, stabilize the protein fold and serve as pivots  
747 upon receptor activation. The existence of such proline scaffold would relieve the steric  
748 constrains on other residues and make class A GPCRs more prone to mutations and, hence,  
749 more evolutionarily adaptable.

750 In sum, Na<sup>+</sup>-dependent GPCRs, after their emergence in primitive eukaryotes, could be fine-  
751 tuned by successive mutations to perform diverse signaling functions. Those mutations would  
752 affect their sensitivity, signal-to-noise ratio, chemical selectivity etc. Furthermore, mutations  
753 could affect even the voltage/current profiles (where current corresponds to the signal  
754 propagation) and determine whether the particular receptor would be sensitized by membrane  
755 potential (as the majority of studied GPCRs, see Fig. 3A, 3B and Table S1) or hemmed by it  
756 (such as M<sub>1</sub> receptor, see Fig. 3C and Table S1).

757

## 758 **Conclusions**

759 Na<sup>+</sup>-binding GPCRs are splendid molecular sensors that utilize the energy of the  
760 transmembrane sodium potential to increase their (i) sensitivity; (ii) signal-to-noise ratio, and  
761 (iii) chemical selectivity. The gift of harnessing energy, in conjunction with high adaptability,  
762 might explain the presence of about 700 class A GPCR-coding genes in the human genome.

763

## 764 **Methods**

### 765 **Model of Na<sup>+</sup> translocation by class A GPCRs**

766 Here we present the solution of the model of GPCR activation. The model implies two  
767 possible operation modes differing in the Na<sup>+</sup> ion behavior upon the receptor activation: in  
768 the carrier-on mode 1, the cation barges through the membrane into the cytoplasm, while in  
769 the carrier-off mode 2 the cation returns into the extracellular space. In each mode, the  
770 system is characterized by 8 possible states of the receptor (Fig. 2) whose probabilities are  
771 defined as P<sub>1</sub>, ..., P<sub>8</sub> (Table 4).

772

773

774 **Table 4.** Probability coefficients for the model of GPCR activation

| Receptor state                        | Probability | Relative probabilities ( $l$ )                                                                                           |
|---------------------------------------|-------------|--------------------------------------------------------------------------------------------------------------------------|
| Inactive receptor                     | $P_1$       | 1                                                                                                                        |
| Inactive receptor with Na             | $P_2$       | $M \cdot [\text{Na}]^{\text{out}}$                                                                                       |
| Inactive receptor with agonist        | $P_3$       | $N \cdot [\text{A}]$                                                                                                     |
| Inactive receptor with agonist and Na | $P_4$       | $\gamma \cdot M [\text{Na}]^{\text{out}} \cdot N \cdot [\text{A}]$                                                       |
| Active receptor                       | $P_5$       | $F_{\text{model}} L^a$                                                                                                   |
| Active receptor with Na               | $P_6$       | $\alpha \cdot L \cdot M \cdot [\text{Na}]^{\text{model}}$                                                                |
| Active receptor with agonist          | $P_7$       | $\beta \cdot L \cdot N \cdot [\text{A}]$                                                                                 |
| Active receptor with agonist and Na   | $P_8$       | $\alpha \cdot \beta \cdot \gamma \cdot \delta \cdot L \cdot M \cdot [\text{Na}]^{\text{model}} \cdot N \cdot [\text{A}]$ |

775

776 Here,  $[\text{Na}]^{\text{model}}$  is the Na concentration available for the receptor in the active state:  $[\text{Na}]^{\text{in}}$  in  
777 the carrier-on mode and  $[\text{Na}]^{\text{out}}$  in the carrier-off mode.  $F_{\text{model}}$  is the electrostatic term of  $\text{Na}^+$   
778 ion translocation, which is equal to  $F_2$  (see Eq. 2) in the carrier-on mode and equal to  $F_1$  (see  
779 Eq. 1) in the carrier-off mode. The forward and backward transitions between the states  $m$   
780 and  $n$  occur at different rates  $l_{1n}$  and  $l_{2m}$ ; the transitions between the inactive (R) and active  
781 (R\*) states of the receptor are the slowest in the system. The principle of detailed balance was  
782 applied separately to all inactive and all active receptor states, whereas the transitions  
783 between active and inactive states are treated as thermodynamically nonequilibrium. In the  
784 stationary state, the cumulative forward and backward transition probabilities between active  
785 and all inactive states match each other:

786

$$787 \quad l_{11}P_1 + l_{12}P_2 + l_{13}P_3 + l_{14}P_4 = l_{25}P_5 + l_{26}P_6 + l_{27}P_7 + l_{28}P_8,$$

788

789 where probabilities  $P_{1-4}$  correspond to all inactive states,  $P_{5-8}$  – to all active states;  $l_{1m}$  and  $l_{2n}$   
790 are the respective transition rate constants (see Table 1). The transition rate constants are not  
791 independent, they satisfy the thermodynamic relationship  $k_{\text{forward}} / k_{\text{back}} = e^{-\Delta G/RT}$ , so the latter  
792 equation can be rewritten as following:

793

$$794 \quad l_1 \left[ P_1 + \alpha^{1/2} P_2 + \beta^{1/2} P_3 + (\alpha\beta\delta)^{1/2} P_4 \right] = l_2 \left[ P_5 + \alpha^{-1/2} P_6 + \beta^{-1/2} P_7 + (\alpha\beta\delta)^{-1/2} P_8 \right]$$

795

796 where  $l_1 = l_{15}$  and  $l_2 = l_{25}$ . The effect of the membrane potential on cation translocation was  
797 accounted for the equilibrium constants of  $\text{Na}^+$  binding in both active (

798  $F_1 = \exp[\theta \Delta \psi F / RT]$ ) and inactive ( $F_2 = \exp[(1 - \theta) \Delta \psi F / RT]$ ) states, where  $\theta$  is the  
799 depth of the  $\text{Na}^+$ -binding site,  $\Delta \psi$  is the transmembrane electric potential, and  $F$  is the  
800 Faraday constant. This leads to the relation:

801  $P_5 = \xi \cdot L \cdot P_1,$

802 where

803 
$$\xi = \frac{1 + \alpha^{1/2} F_1 X_{out} + \beta^{1/2} Y + (\alpha \beta \delta)^{1/2} F_1 \gamma X_{out} Y}{1 + \alpha^{1/2} F_2 X_{in} + \beta^{1/2} Y + (\alpha \beta \delta)^{1/2} F_2 \gamma X_{in} Y},$$

804 and  $L = l_1/l_2$ . In the latter equation we have used  $X_{in/out} = M \cdot [Na^+]_{in/out}$   
805 and  $Y = N \cdot [agonist]$  respectively.

806 To these equations we must add the probabilities normalization requirement:

807

808 
$$\sum_{i=1..8} P_i = 1$$

809 and resulting set of equations provides a solution to our model.

810 Suggested models for GPCR activation were implemented as Matlab R2017a functions [93].  
811 Experimental data were obtained from respective publications and fitted with model  
812 functions using the Matlab' "lsqcurvefit" function. During the fit, the allosteric coefficients  $\alpha$ -  
813  $\delta$  and the depth of the  $\text{Na}^+$ -binding site were kept constant. The goal was to find coefficients  
814  $M$  ( $\text{Na}^+$ -binding constant) and  $N$  (agonist-binding constant) that provided the best fit of the  
815 experimental data (two sets of data points obtained at different membrane potential) with the  
816 two model curves calculated with identical parameters except for the membrane potential  
817 values.

818

### 819 **Structure analysis**

820 Structure superposition and visualization were performed with PyMol v 1.7 [72] and  
821 YASARA [94]. Structure analyses were performed with the WHAT IF [95] subset of the  
822 YASARA Twinset. Cavities and caves were calculated using the method by Voorintholt et al  
823 [96] with a spherical probe of the 1.4 Å radius. These were visualized using a 1 Å resolution  
824 grid. Structures were superposed using the method of Vriend and Sander [97]. Rotamer  
825 distributions were calculated using the method of China et al. [70]. Briefly, the rotamer  
826 distribution software searches the PDB for stretches of five residues that (i) have a very  
827 similar backbone as observed in the local structure and (ii) have the same middle residue as

828 the local structure. The obtained database stretches is then superposed on the local structure,  
829 but only the side chain of the middle residue is shown.

830

### 831 ***Acknowledgements***

832 The authors would like to thank Profs. V. Katritch, H.-J. Steinhoff and H. Vogel for  
833 encouragement and very useful discussions. Helpful advises of Dr. N.P. Isaev are greatly  
834 appreciated. The calculations were done using the equipment of the shared research facilities  
835 of HPC computing resources at Lomonosov Moscow State University supported by its  
836 Development Program. This study was supported by the *Deutsche Forschungsgemeinschaft*,  
837 Federal Ministry of Education and Research of Germany, the EvoCell Program of the  
838 Osnabrueck University (AYM), the *Ostpartnerschaftenprogramm* of the German Academic  
839 Exchange Service (DAAD), the Russian Government contract (AAAA-A19-119012890064-  
840 7), and the 14-50-00029 grant from the Russian Science Foundation (DNS). MYG is  
841 supported by the Intramural Research Program of the NIH at the National Library of  
842 Medicine.

### 843 ***Author contributions***

844 AYM designed the study. AYM, DAC and DNS developed the model. DNS calculated the  
845 model and fitted experimental data. DNS, AYM, MYG and GV performed the structural  
846 analysis. DNS, MYG and AYM performed the evolutionary analysis. DNS, DAC, MYG,  
847 GV and AYM wrote the paper.

848

### 849 ***Competing interests***

850 Authors confirm that there have been no involvements that might raise the question of bias in  
851 the work reported or in the conclusions, implications, or opinions stated.

852

853

854



## 855 **References**

- 856 [1] V. Katritch, V. Cherezov, R.C. Stevens, Structure-function of the G protein-coupled receptor  
857 superfamily, *Annu Rev Pharmacol Toxicol*, 53 (2013) 531-556.
- 858 [2] A. Manglik, T.H. Kim, M. Masureel, C. Altenbach, Z. Yang, D. Hilger, M.T. Lerch, T.S. Kobilka,  
859 F.S. Thian, W.L. Hubbell, R.S. Prosser, B.K. Kobilka, Structural insights into the dynamic  
860 process of beta2-adrenergic receptor signaling, *Cell*, 161 (2015) 1101-1111.
- 861 [3] D.G. Isom, H.G. Dohlman, Buried ionizable networks are an ancient hallmark of G protein-  
862 coupled receptor activation, *Proc. Natl. Acad. Sci. USA*, 112 (2015) 5702-5707.
- 863 [4] D. Wacker, R.C. Stevens, B.L. Roth, How Ligands Illuminate GPCR Molecular Pharmacology,  
864 *Cell*, 170 (2017) 414-427.
- 865 [5] A. Krishnan, M.S. Almen, R. Fredriksson, H.B. Schioth, The origin of GPCRs: identification of  
866 mammalian like Rhodopsin, Adhesion, Glutamate and Frizzled GPCRs in fungi, *PLoS One*, 7  
867 (2012) e29817.
- 868 [6] K.J. Nordstrom, M. Sallman Almen, M.M. Edstam, R. Fredriksson, H.B. Schioth, Independent  
869 HHsearch, Needleman--Wunsch-based, and motif analyses reveal the overall hierarchy for most  
870 of the G protein-coupled receptor families, *Molecular biology and evolution*, 28 (2011) 2471-  
871 2480.
- 872 [7] D.N. Shalaeva, M.Y. Galperin, A.Y. Mulkidjanian, Eukaryotic G protein-coupled receptors as  
873 descendants of prokaryotic sodium-translocating rhodopsins, *Biol. Direct*, 10 (2015) 63.
- 874 [8] K. Palczewski, T. Kumasaka, T. Hori, C.A. Behnke, H. Motoshima, B.A. Fox, I. Le Trong, D.C.  
875 Teller, T. Okada, R.E. Stenkamp, M. Yamamoto, M. Miyano, Crystal structure of rhodopsin: A  
876 G protein-coupled receptor, *Science*, 289 (2000) 739-745.
- 877 [9] J.H. Park, P. Scheerer, K.P. Hofmann, H.W. Choe, O.P. Ernst, Crystal structure of the ligand-free  
878 G-protein-coupled receptor opsin, *Nature*, 454 (2008) 183-187.
- 879 [10] P. Scheerer, J.H. Park, P.W. Hildebrand, Y.J. Kim, N. Krauss, H.W. Choe, K.P. Hofmann, O.P.  
880 Ernst, Crystal structure of opsin in its G-protein-interacting conformation, *Nature*, 455 (2008)  
881 497-502.
- 882 [11] B. Kobilka, G.F. Schertler, New G-protein-coupled receptor crystal structures: insights and  
883 limitations, *Trends Pharmacol. Sci.*, 29 (2008) 79-83.
- 884 [12] W. Liu, E. Chun, A.A. Thompson, P. Chubukov, F. Xu, V. Katritch, G.W. Han, C.B. Roth, L.H.  
885 Heitman, I.J. AP, V. Cherezov, R.C. Stevens, Structural basis for allosteric regulation of GPCRs  
886 by sodium ions, *Science*, 337 (2012) 232-236.
- 887 [13] A.C. Kruse, A.M. Ring, A. Manglik, J. Hu, K. Hu, K. Eitel, H. Hubner, E. Pardon, C. Valant,  
888 P.M. Sexton, A. Christopoulos, C.C. Felder, P. Gmeiner, J. Steyaert, W.I. Weis, K.C. Garcia, J.  
889 Wess, B.K. Kobilka, Activation and allosteric modulation of a muscarinic acetylcholine receptor,  
890 *Nature*, 504 (2013) 101-106.
- 891 [14] K. Haga, A.C. Kruse, H. Asada, T. Yurugi-Kobayashi, M. Shiroishi, C. Zhang, W.I. Weis, T.  
892 Okada, B.K. Kobilka, T. Haga, T. Kobayashi, Structure of the human M2 muscarinic  
893 acetylcholine receptor bound to an antagonist, *Nature*, 482 (2012) 547-U147.
- 894 [15] G. Fenalti, P.M. Giguere, V. Katritch, X.P. Huang, A.A. Thompson, V. Cherezov, B.L. Roth,  
895 R.C. Stevens, Molecular control of delta-opioid receptor signalling, *Nature*, 506 (2014) 191-196.
- 896 [16] J.L. Miller-Gallacher, R. Nehme, T. Warne, P.C. Edwards, G.F. Schertler, A.G. Leslie, C.G.  
897 Tate, The 2.1 Å resolution structure of cyanopindolol-bound beta1-adrenoceptor identifies an  
898 intramembrane Na<sup>+</sup> ion that stabilises the ligand-free receptor, *PLoS One*, 9 (2014) e92727.

- 899 [17] J.A. Ballesteros, H. Weinstein, Integrated methods for the construction of three-dimensional  
900 models and computational probing of structure-function relations in G protein-coupled receptors,  
901 in: *Methods in Neurosciences*, Elsevier, 1995, pp. 366-428.
- 902 [18] V. Isberg, C. de Graaf, A. Bortolato, V. Cherezov, V. Katritch, F.H. Marshall, S. Mordalski, J.P.  
903 Pin, R.C. Stevens, G. Vriend, D.E. Gloriam, Generic GPCR residue numbers - aligning topology  
904 maps while minding the gaps, *Trends Pharmacol. Sci.*, 36 (2015) 22-31.
- 905 [19] B. Knierim, K.P. Hofmann, W. Gartner, W.L. Hubbell, O.P. Ernst, Rhodopsin and 9-demethyl-  
906 retinal analog: effect of a partial agonist on displacement of transmembrane helix 6 in class A G  
907 protein-coupled receptors, *J. Biol. Chem.*, 283 (2008) 4967-4974.
- 908 [20] B. Knierim, K.P. Hofmann, O.P. Ernst, W.L. Hubbell, Sequence of late molecular events in the  
909 activation of rhodopsin, *Proc. Natl. Acad. Sci. USA*, 104 (2007) 20290-20295.
- 910 [21] L. Shi, G. Liapakis, R. Xu, F. Guarnieri, J.A. Ballesteros, J.A. Javitch, Beta2 adrenergic receptor  
911 activation. Modulation of the proline kink in transmembrane 6 by a rotamer toggle switch, *J Biol*  
912 *Chem*, 277 (2002) 40989-40996.
- 913 [22] M.T. Eddy, M.Y. Lee, Z.G. Gao, K.L. White, T. Didenko, R. Horst, M. Audet, P. Stanczak, K.M.  
914 McClary, G.W. Han, K.A. Jacobson, R.C. Stevens, K. Wuthrich, allosteric coupling of drug  
915 binding and intracellular signaling in the A<sub>2A</sub> adenosine receptor, *Cell*, 172 (2018) 68-80 e12.
- 916 [23] S. Yuan, K. Palczewski, Q. Peng, M. Kolinski, H. Vogel, S. Filipek, The mechanism of ligand-  
917 induced activation or inhibition of mu- and kappa-opioid receptors, *Angew Chem Int Ed Engl*, 54  
918 (2015) 7560-7563.
- 919 [24] S. Yuan, Z. Hu, S. Filipek, H. Vogel, W246(6.48) opens a gate for a continuous intrinsic water  
920 pathway during activation of the adenosine A<sub>2A</sub> receptor, *Angew Chem Int Ed Engl*, 54 (2015)  
921 556-559.
- 922 [25] S. Yuan, H. Vogel, S. Filipek, The role of water and sodium ions in the activation of the mu-  
923 opioid receptor, *Angew Chem Int Ed Engl*, 52 (2013) 10112-10115.
- 924 [26] V. Katritch, G. Fenalti, E.E. Abola, B.L. Roth, V. Cherezov, R.C. Stevens, Allosteric sodium in  
925 class A GPCR signaling, *Trends Biochem. Sci.*, 39 (2014) 233-244.
- 926 [27] A. Massink, H. Gutierrez-de-Teran, E.B. Lenselink, N.V. Ortiz Zacarias, L. Xia, L.H. Heitman,  
927 V. Katritch, R.C. Stevens, A.P. IJzerman, Sodium ion binding pocket mutations and adenosine  
928 A<sub>2A</sub> receptor function, *Mol. Pharmacol.*, 87 (2015) 305-313.
- 929 [28] K.L. White, M.T. Eddy, Z.G. Gao, G.W. Han, T. Lian, A. Deary, N. Patel, K.A. Jacobson, V.  
930 Katritch, R.C. Stevens, Structural connection between activation microswitch and allosteric  
931 sodium site in gpcr signaling, *Structure*, 26 (2018) 259-269 e255.
- 932 [29] M.A. Lomize, I.D. Pogozheva, H. Joo, H.I. Mosberg, A.L. Lomize, OPM database and PPM web  
933 server: resources for positioning of proteins in membranes, *Nucleic Acids Res.*, 40 (2012) D370-  
934 376.
- 935 [30] C.B. Pert, G. Pasternak, S.H. Snyder, Opiate agonists and antagonists discriminated by receptor  
936 binding in brain, *Science*, 182 (1973) 1359-1361.
- 937 [31] D.A. Horstman, S. Brandon, A.L. Wilson, C.A. Guyer, E.J. Cragoe, Jr., L.E. Limbird, An  
938 aspartate conserved among G-protein receptors confers allosteric regulation of alpha 2-adrenergic  
939 receptors by sodium, *J. Biol. Chem.*, 265 (1990) 21590-21595.
- 940 [32] K.E. Livingston, J.R. Traynor, Disruption of the Na<sup>+</sup> ion binding site as a mechanism for positive  
941 allosteric modulation of the mu-opioid receptor, *Proc. Natl. Acad. Sci. USA*, 111 (2014) 18369-  
942 18374.
- 943 [33] Y. Shang, V. LeRouzic, S. Schneider, P. Bisignano, G.W. Pasternak, M. Filizola, Mechanistic  
944 insights into the allosteric modulation of opioid receptors by sodium ions, *Biochemistry*, 53  
945 (2014) 5140-5149.

- 946 [34] S.G. Rasmussen, H.J. Choi, J.J. Fung, E. Pardon, P. Casarosa, P.S. Chae, B.T. Devree, D.M.  
947 Rosenbaum, F.S. Thian, T.S. Kobilka, A. Schnapp, I. Konetzki, R.K. Sunahara, S.H. Gellman, A.  
948 Pautsch, J. Steyaert, W.I. Weis, B.K. Kobilka, Structure of a nanobody-stabilized active state of  
949 the beta(2) adrenoceptor, *Nature*, 469 (2011) 175-180.
- 950 [35] W. Huang, A. Manglik, A.J. Venkatakrisnan, T. Laeremans, E.N. Feinberg, A.L. Sanborn, H.E.  
951 Kato, K.E. Livingston, T.S. Thorsen, R.C. Kling, S. Granier, P. Gmeiner, S.M. Husbands, J.R.  
952 Traynor, W.I. Weis, J. Steyaert, R.O. Dror, B.K. Kobilka, Structural insights into micro-opioid  
953 receptor activation, *Nature*, 524 (2015) 315-321.
- 954 [36] S. Yuan, S. Filipek, K. Palczewski, H. Vogel, Activation of G-protein-coupled receptors  
955 correlates with the formation of a continuous internal water pathway, *Nat Commun*, 5 (2014)  
956 4733.
- 957 [37] O.N. Vickery, C.A. Carvalheda, S.A. Zaidi, A.V. Pislakov, V. Katritch, U. Zachariae,  
958 Intracellular Transfer of Na(+) in an Active-State G-Protein-Coupled Receptor, *Structure*, 26  
959 (2018) 171-180 e172.
- 960 [38] M.P. Mahaut-Smith, J. Martinez-Pinna, I.S. Gurung, A role for membrane potential in regulating  
961 GPCRs?, *Trends Pharmacol. Sci.*, 29 (2008) 421-429.
- 962 [39] O.N. Vickery, J.P. Machtens, U. Zachariae, Membrane potentials regulating GPCRs: insights  
963 from experiments and molecular dynamics simulations, *Curr Opin Pharmacol*, 30 (2016) 44-50.
- 964 [40] M. Wikstrom, K. Krab, M. Saraste, Proton-translocating cytochrome complexes, *Annu Rev*  
965 *Biochem*, 50 (1981) 623-655.
- 966 [41] P. Leff, The two-state model of receptor activation, *Trends Pharmacol. Sci.*, 16 (1995) 89-97.
- 967 [42] D.A. Hall, Modeling the functional effects of allosteric modulators at pharmacological receptors:  
968 an extension of the two-state model of receptor activation, *Mol Pharmacol*, 58 (2000) 1412-1423.
- 969 [43] R.A. Copeland, The drug-target residence time model: a 10-year retrospective, *Nat Rev Drug*  
970 *Discov*, 15 (2016) 87-95.
- 971 [44] R.A. Copeland, Drug-target residence time, in: G.M. Keseru (Ed.) *Thermodynamics and*  
972 *Kinetics of Drug Binding*, Wiley-VCH Verlag GmbH, 2015, pp. 157-167.
- 973 [45] R. Lamichhane, J.J. Liu, G. Pljevaljcic, K.L. White, E. van der Schans, V. Katritch, R.C. Stevens,  
974 K. Wuthrich, D.P. Millar, Single-molecule view of basal activity and activation mechanisms of  
975 the G protein-coupled receptor beta2AR, *Proc Natl Acad Sci U S A*, 112 (2015) 14254-14259.
- 976 [46] L. Ye, N. Van Eps, M. Zimmer, O.P. Ernst, R.S. Prosser, Activation of the A<sub>2A</sub> adenosine G-  
977 protein-coupled receptor by conformational selection, *Nature*, 533 (2016) 265-268.
- 978 [47] L. Susac, M.T. Eddy, T. Didenko, R.C. Stevens, K. Wuthrich, A<sub>2A</sub> adenosine receptor functional  
979 states characterized by (19)F-NMR, *Proc Natl Acad Sci U S A*, (2018).
- 980 [48] S. Arnis, K.P. Hofmann, Two different forms of metarhodopsin II: Schiff base deprotonation  
981 precedes proton uptake and signaling state, *Proc. Natl. Acad. Sci. USA*, 90 (1993) 7849-7853.
- 982 [49] A. Rinne, J.C. Mobarec, M. Mahaut-Smith, P. Kolb, M. Bunemann, The mode of agonist binding  
983 to a G protein-coupled receptor switches the effect that voltage changes have on signaling, *Sci*  
984 *Signal*, 8 (2015).
- 985 [50] A. Rinne, A. Birk, M. Bunemann, Voltage regulates adrenergic receptor function, *Proc. Natl.*  
986 *Acad. Sci. USA*, 110 (2013) 1536-1541.
- 987 [51] Y. Ben-Chaim, O. Tour, N. Dascal, I. Parnas, H. Parnas, The M2 muscarinic G-protein-coupled  
988 receptor is voltage-sensitive, *J. Biol. Chem.*, 278 (2003) 22482-22491.
- 989 [52] Y. Ben-Chaim, B. Chanda, N. Dascal, F. Bezanilla, I. Parnas, H. Parnas, Movement of 'gating  
990 charge' is coupled to ligand binding in a G-protein-coupled receptor, *Nature*, 444 (2006) 106-  
991 109.

- 992 [53] P.G. Strange, Agonist binding, agonist affinity and agonist efficacy at G protein-coupled  
993 receptors, *Br J Pharmacol*, 153 (2008) 1353-1363.
- 994 [54] O. Barchad-Avitzur, M.F. Priest, N. Dekel, F. Bezanilla, H. Parnas, Y. Ben-Chaim, A novel  
995 voltage sensor in the orthosteric binding site of the M2 muscarinic receptor, *Biophys. J.*, 111  
996 (2016) 1396-1408.
- 997 [55] P. Mitchell, Chemiosmotic coupling in oxidative and photosynthetic phosphorylation, *Biol Rev*  
998 *Camb Philos Soc*, 41 (1966) 445-502.
- 999 [56] P. Dimroth, Bacterial energy transductions coupled to sodium ions, *Res Microbiol*, 141 (1990)  
1000 332-336.
- 1001 [57] R.A. Navarro-Polanco, E.G. Moreno Galindo, T. Ferrer-Villada, M. Arias, J.R. Rigby, J.A.  
1002 Sanchez-Chapula, M. Tristani-Firouzi, Conformational changes in the M2 muscarinic receptor  
1003 induced by membrane voltage and agonist binding, *J Physiol*, 589 (2011) 1741-1753.
- 1004 [58] E.G. Moreno-Galindo, J. Alamilla, J.A. Sanchez-Chapula, M. Tristani-Firouzi, R.A. Navarro-  
1005 Polanco, The agonist-specific voltage dependence of M2 muscarinic receptors modulates the  
1006 deactivation of the acetylcholine-gated K(+) current (I KACH), *Pflugers Arch*, 468 (2016) 1207-  
1007 1214.
- 1008 [59] K. Sahlholm, D. Marcellino, J. Nilsson, K. Fuxe, P. Arhem, Voltage-sensitivity at the human  
1009 dopamine D2S receptor is agonist-specific, *Biochem. Biophys. Res. Commun.*, 377 (2008) 1216-  
1010 1221.
- 1011 [60] K. Sahlholm, O. Barchad-Avitzur, D. Marcellino, M. Gomez-Soler, K. Fuxe, F. Ciruela, P.  
1012 Arhem, Agonist-specific voltage sensitivity at the dopamine D2S receptor--molecular  
1013 determinants and relevance to therapeutic ligands, *Neuropharmacology*, 61 (2011) 937-949.
- 1014 [61] K. Sahlholm, D. Marcellino, J. Nilsson, K. Fuxe, P. Arhem, Differential voltage-sensitivity of  
1015 D2-like dopamine receptors, *Biochem. Biophys. Res. Commun.*, 374 (2008) 496-501.
- 1016 [62] A.C. Kruse, J. Hu, B.K. Kobilka, J. Wess, Muscarinic acetylcholine receptor X-ray structures:  
1017 potential implications for drug development, *Curr Opin Pharmacol*, 16 (2014) 24-30.
- 1018 [63] Y. Ben Chaim, S. Bochnik, I. Parnas, H. Parnas, Voltage affects the dissociation rate constant of  
1019 the m2 muscarinic receptor, *PLoS One*, 8 (2013) e74354.
- 1020 [64] L. Oliveira, A.C.d.M. Paiva, G. Vriend, A common motif in G-protein-coupled seven  
1021 transmembrane helix receptors, *J Comput Aid Mol Des*, 7 (1993) 649-658.
- 1022 [65] R. Nygaard, T.M. Frimurer, B. Holst, M.M. Rosenkilde, T.W. Schwartz, Ligand binding and  
1023 micro-switches in 7TM receptor structures, *Trends Pharmacol. Sci.*, 30 (2009) 249-259.
- 1024 [66] B. Trzaskowski, D. Latek, S. Yuan, U. Ghoshdastider, A. Debinski, S. Filipek, Action of  
1025 molecular switches in GPCRs--theoretical and experimental studies, *Curr Med Chem*, 19 (2012)  
1026 1090-1109.
- 1027 [67] V. Isberg, B. Vroling, R. van der Kant, K. Li, G. Vriend, D. Gloriam, GPCRDB: an information  
1028 system for G protein-coupled receptors, *Nucleic Acids Res.*, 42 (2014) D422-D425.
- 1029 [68] T. Okada, O.P. Ernst, K. Palczewski, K.P. Hofmann, Activation of rhodopsin: new insights from  
1030 structural and biochemical studies, *Trends Biochem. Sci.*, 26 (2001) 318-324.
- 1031 [69] B.G. Tehan, A. Bortolato, F.E. Blaney, M.P. Weir, J.S. Mason, Unifying family A GPCR  
1032 theories of activation, *Pharmacol Ther*, 143 (2014) 51-60.
- 1033 [70] G. Chinae, G. Padron, R.W. Hooft, C. Sander, G. Vriend, The use of position-specific rotamers  
1034 in model building by homology, *Proteins-Structure Function and Bioinformatics*, 23 (1995) 415-  
1035 421.
- 1036 [71] R.P. Joosten, F. Long, G.N. Murshudov, A. Perrakis, The PDB\_REDO server for  
1037 macromolecular structure model optimization, *IUCrJ*, 1 (2014) 213-220.

- 1038 [72] The PyMOL Molecular Graphics System, Version 1.7.2.1, in, Schrödinger, LLC., 2010.
- 1039 [73] I. Gushchin, V. Shevchenko, V. Polovinkin, K. Kovalev, A. Alekseev, E. Round, V.  
1040 Borshchevskiy, T. Balandin, A. Popov, T. Gensch, C. Fahlke, C. Bamann, D. Willbold, G. Buldt,  
1041 E. Bamberg, V. Gordeliy, Crystal structure of a light-driven sodium pump, *Nat Struct Mol Biol*,  
1042 22 (2015) 390-395.
- 1043 [74] H.E. Kato, K. Inoue, R. Abe-Yoshizumi, Y. Kato, H. Ono, M. Konno, S. Hososhima, T. Ishizuka,  
1044 M.R. Hoque, H. Kunitomo, J. Ito, S. Yoshizawa, K. Yamashita, M. Takemoto, T. Nishizawa, R.  
1045 Taniguchi, K. Kogure, A.D. Maturana, Y. Iino, H. Yawo, R. Ishitani, H. Kandori, O. Nureki,  
1046 Structural basis for Na<sup>+</sup> transport mechanism by a light-driven Na<sup>+</sup> pump, *Nature*, 521 (2015) 48-  
1047 53.
- 1048 [75] M.S. Bee, E.C. Hulme, Functional analysis of transmembrane domain 2 of the M1 muscarinic  
1049 acetylcholine receptor, *J. Biol. Chem.*, 282 (2007) 32471-32479.
- 1050 [76] G. Lebon, T. Warne, P.C. Edwards, K. Bennett, C.J. Langmead, A.G.W. Leslie, C.G. Tate,  
1051 Agonist-bound adenosine A(2A) receptor structures reveal common features of GPCR activation,  
1052 *Nature*, 474 (2011) 521-U154.
- 1053 [77] J.M. Bibbe, G. Vriend, Motions around conserved structural weak spots determine GPCR  
1054 activity, submitted, (2019).
- 1055 [78] A. Warshel, S.T. Russell, Calculations of electrostatic interactions in biological systems and in  
1056 solutions, *Q Rev Biophys*, 17 (1984) 283-422.
- 1057 [79] A.Y. Mulkidjanian, M.Y. Galperin, K.S. Makarova, Y.I. Wolf, E.V. Koonin, Evolutionary  
1058 primacy of sodium bioenergetics, *Biol. Direct*, 3 (2008) 13.
- 1059 [80] T. Meier, A. Krahl, P.J. Bond, D. Pogoryelov, K. Diederichs, J.D. Faraldo-Gomez, Complete ion-  
1060 coordination structure in the rotor ring of Na<sup>+</sup>-dependent F-ATP synthases, *J. Mol. Biol.*, 391  
1061 (2009) 498-507.
- 1062 [81] G. Kaim, F. Wehrle, U. Gerike, P. Dimroth, Molecular basis for the coupling ion selectivity of  
1063 F1F0 ATP synthases: probing the liganding groups for Na<sup>+</sup> and Li<sup>+</sup> in the c subunit of the ATP  
1064 synthase from *Propionigenium modestum*, *Biochemistry*, 36 (1997) 9185-9194.
- 1065 [82] A. Dickey, R. Faller, Examining the contributions of lipid shape and headgroup charge on bilayer  
1066 behavior, *Biophys. J.*, 95 (2008) 2636-2646.
- 1067 [83] S. Jo, T. Kim, V.G. Iyer, W. Im, CHARMM-GUI: a web-based graphical user interface for  
1068 CHARMM, *J. Comput. Chem.*, 29 (2008) 1859-1865.
- 1069 [84] O. Volkov, K. Kovalev, V. Polovinkin, V. Borshchevskiy, C. Bamann, R. Astashkin, E. Marin,  
1070 A. Popov, T. Balandin, D. Willbold, G. Buldt, E. Bamberg, V. Gordeliy, Structural insights into  
1071 ion conduction by channelrhodopsin 2, *Science*, 358 (2017).
- 1072 [85] A.A. Wegener, I. Chizhov, M. Engelhard, H.J. Steinhoff, Time-resolved detection of transient  
1073 movement of helix F in spin-labelled pharaonis sensory rhodopsin II, *J. Mol. Biol.*, 301 (2000)  
1074 881-891.
- 1075 [86] J.P. Klare, E. Bordignon, M. Engelhard, H.J. Steinhoff, Sensory rhodopsin II and  
1076 bacteriorhodopsin: light activated helix F movement, *Photochem. Photobiol. Sci.*, 3 (2004) 543-  
1077 547.
- 1078 [87] T. Sattig, C. Rickert, E. Bamberg, H.J. Steinhoff, C. Bamann, Light-induced movement of the  
1079 transmembrane helix B in channelrhodopsin-2, *Angew Chem Int Ed Engl*, 52 (2013) 9705-9708.
- 1080 [88] S.P. Balashov, E.S. Imasheva, A.K. Dioumaev, J.M. Wang, K.H. Jung, J.K. Lanyi, Light-driven  
1081 Na<sup>+</sup> pump from *Gillisia limnaea*: a high-affinity Na<sup>+</sup> binding site is formed transiently in the  
1082 photocycle, *Biochemistry*, 53 (2014) 7549-7561.
- 1083 [89] X.C. Zhang, C. Cao, Y. Zhou, Y. Zhao, Proton transfer-mediated GPCR activation, *Protein Cell*,  
1084 6 (2015) 12-17.

- 1085 [90] P. Dimroth, C. von Ballmoos, T. Meier, Catalytic and mechanical cycles in F-ATP synthases.  
1086 Fourth in the Cycles Review Series, EMBO Rep, 7 (2006) 276-282.
- 1087 [91] A.Y. Mulkidjanian, P. Dibrov, M.Y. Galperin, The past and present of sodium energetics: may  
1088 the sodium-motive force be with you, Biochim. Biophys. Acta, 1777 (2008) 985-992.
- 1089 [92] D.V. Dibrova, M.Y. Galperin, E.V. Koonin, A.Y. Mulkidjanian, Ancient systems of  
1090 sodium/potassium homeostasis as predecessors of membrane bioenergetics, Biochemistry  
1091 (Mosc), 80 (2015) 495-516.
- 1092 [93] MATLAB and Statistics Toolbox Release 2017a, in, The MathWorks, Inc. , 2017.
- 1093 [94] E. Krieger, G. Vriend, YASARA View-molecular graphics for all devices-from smartphones to  
1094 workstations, Bioinformatics, 30 (2014) 2981-2982.
- 1095 [95] G. Vriend, WHAT IF: a molecular modeling and drug design program, J Mol Graph, 8 (1990)  
1096 52-56, 29.
- 1097 [96] R. Voorintholt, M.T. Kusters, G. Vegter, G. Vriend, W.G. Hol, A very fast program for  
1098 visualizing protein surfaces, channels and cavities, J Mol Graph, 7 (1989) 243-245.
- 1099 [97] G. Vriend, C. Sander, Detection of common three-dimensional substructures in proteins,  
1100 Proteins-Structure Function and Bioinformatics, 11 (1991) 52-58.  
1101  
1102
